# Supplementary material
Source: PubMed Central journal article supplement (PMC2927134)

# Supporting Information

An Efficient System For the Pd-Catalyzed Cross-Coupling of Amides and Aryl Chlorides

Brett P. Fors, Karin Dooleweerd, Qingle Zeng, and Stephen L. Buchwald\*

*Department of Chemistry, Massachusetts Institute of Technology  
Cambridge, Massachusetts 02139*

\*Corresponding author. Email: [sbuchwal@mit.edu](mailto:sbuchwal@mit.edu) (S.L. Buchwald).

BF-VI-tbuBrettPhos

Pulse Sequence: s2bu1

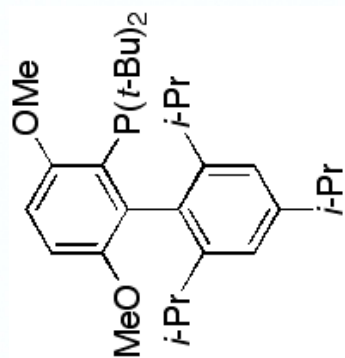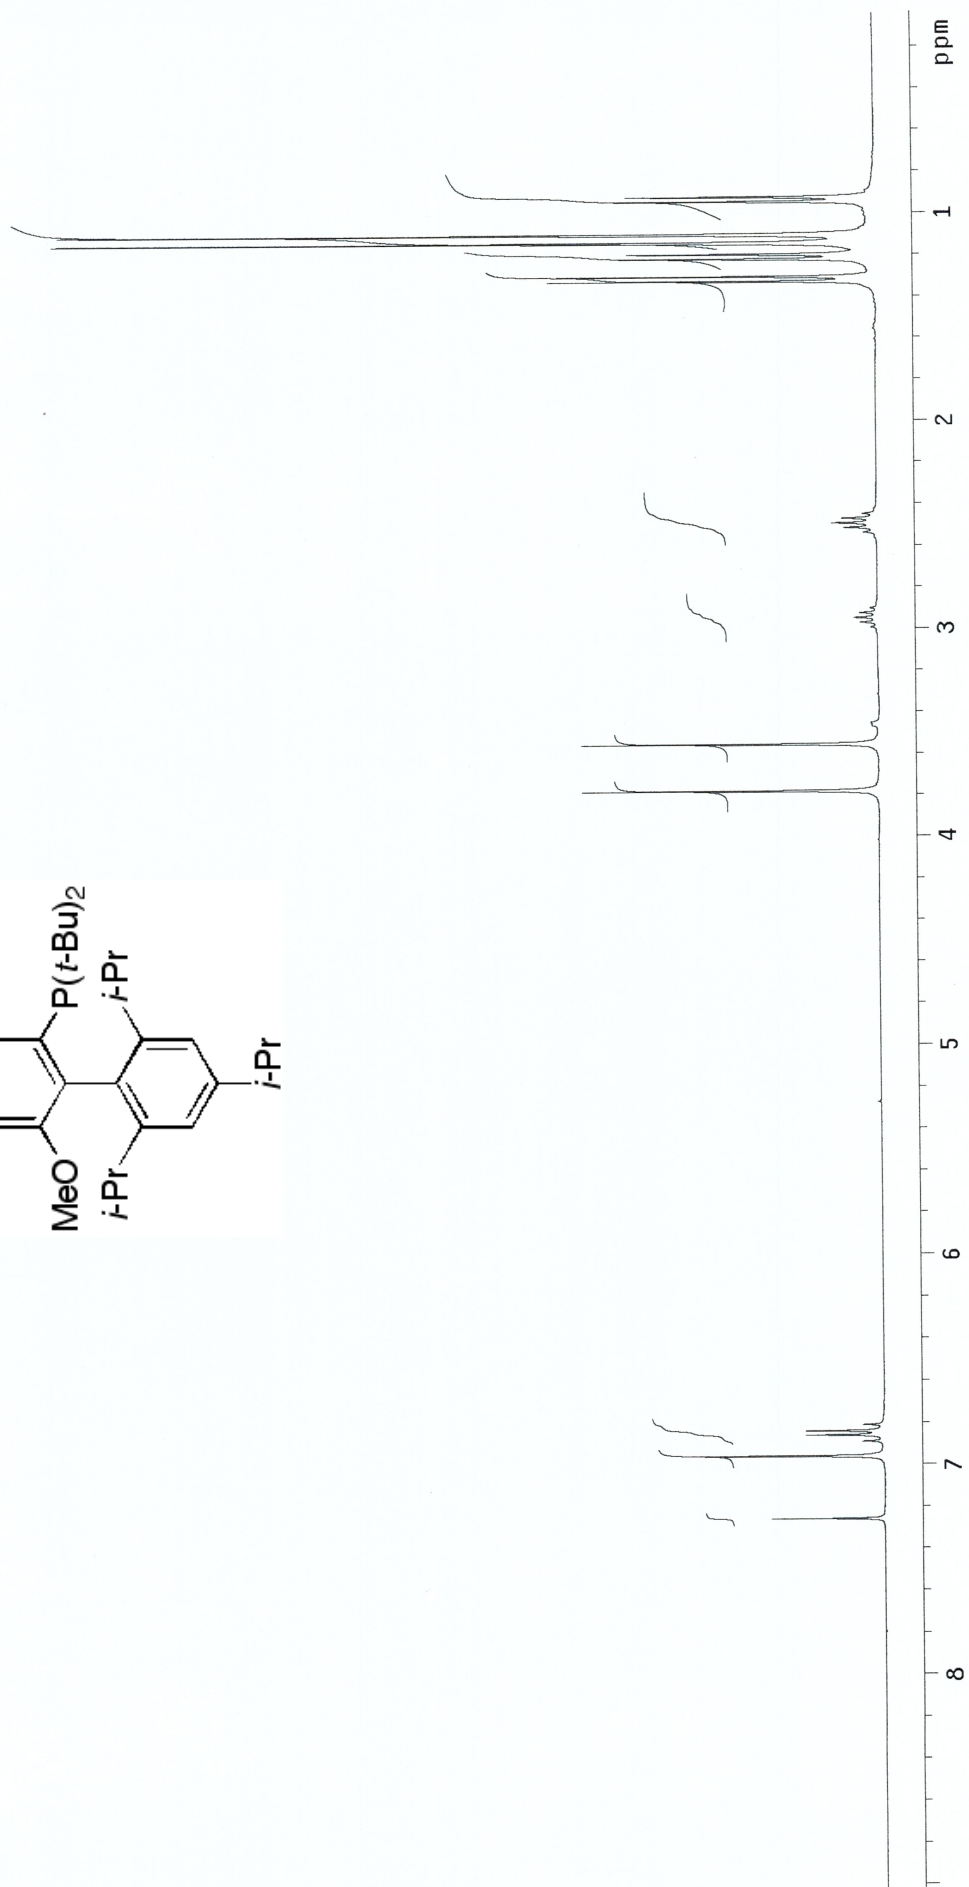

BF-VI-tbuBrettPhos-13C

Pulse Sequence: s2pu1

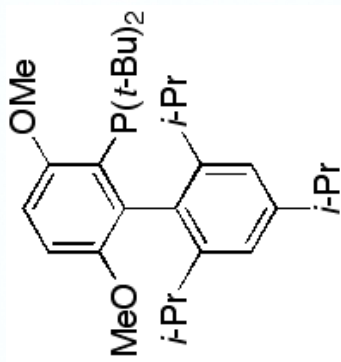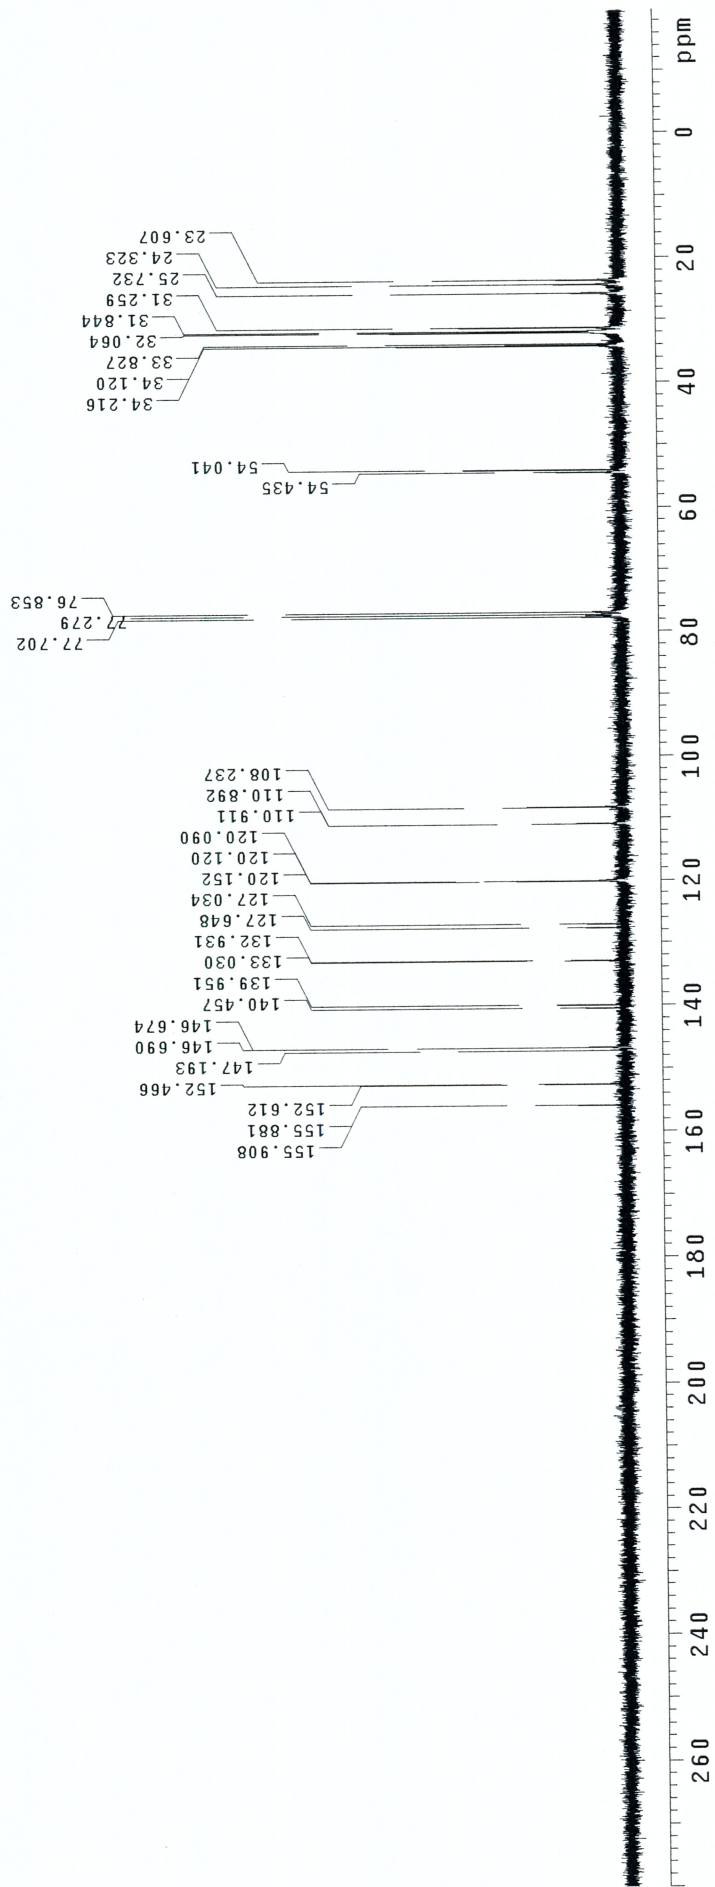

BF-VI-tbuBrettPhos-31P

Pulse Sequence: s2bu1

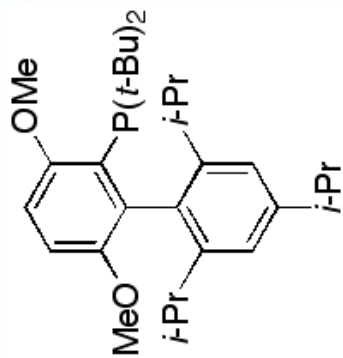

34.781

ppm

-60

-40

-20

0

20

40

60

80

100



KD77

Pulse Sequence: s2pu1

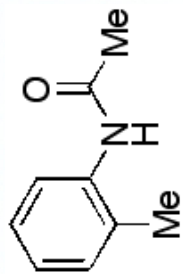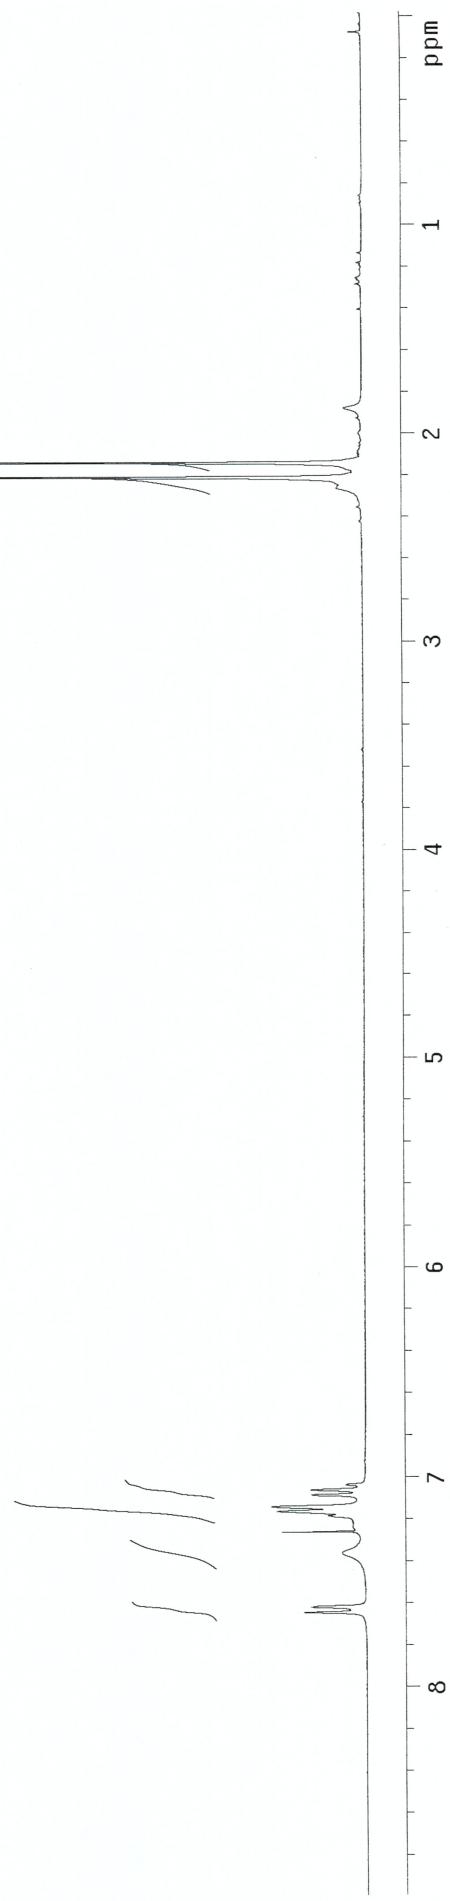

KD77

Pulse Sequence: s2pu1

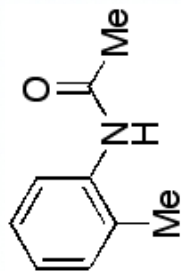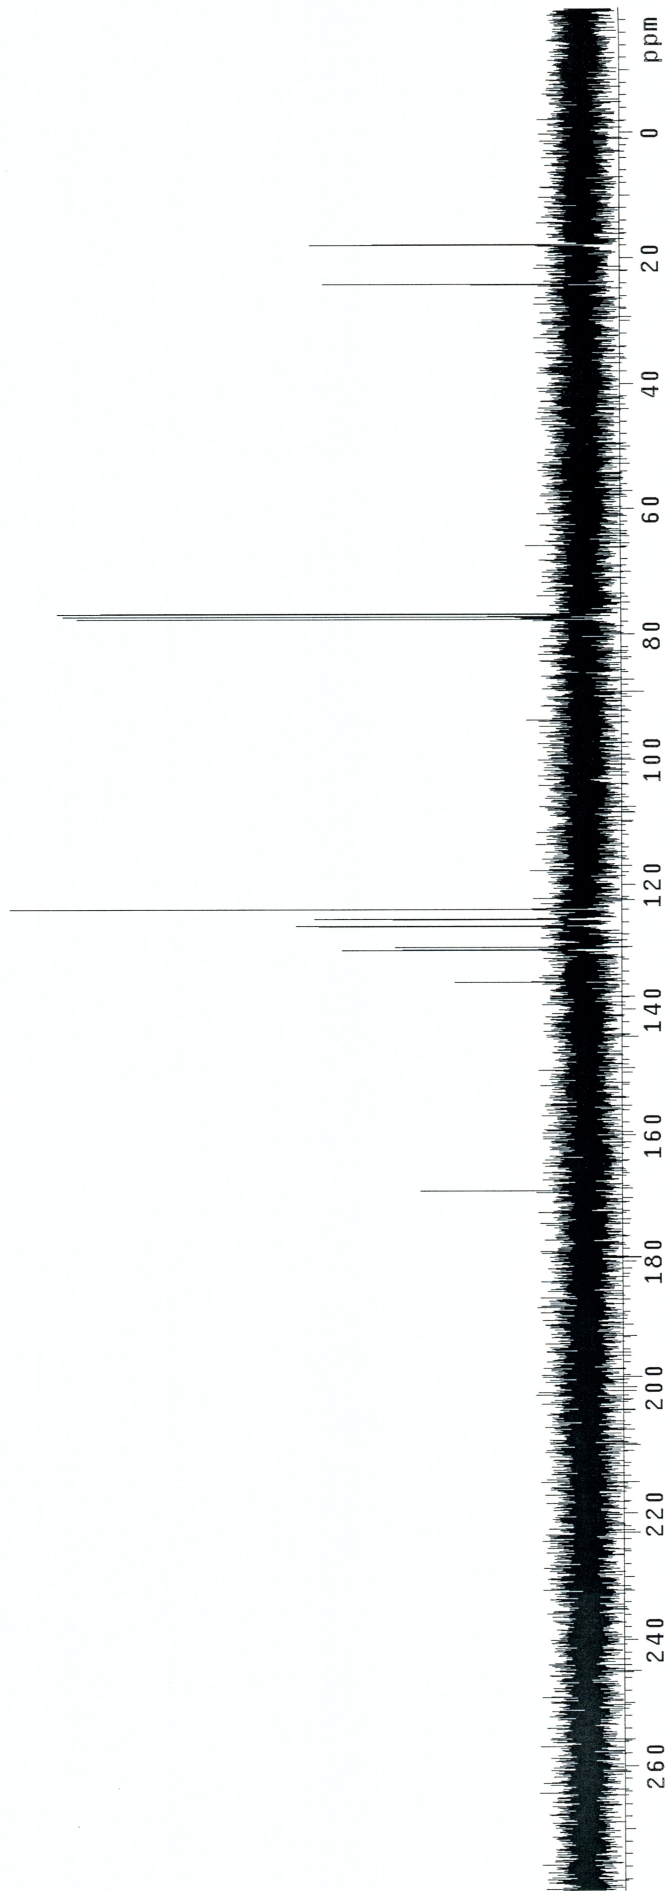

KD110

Pulse Sequence: s2pu1

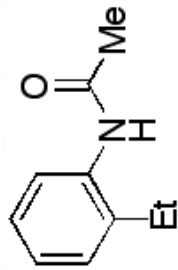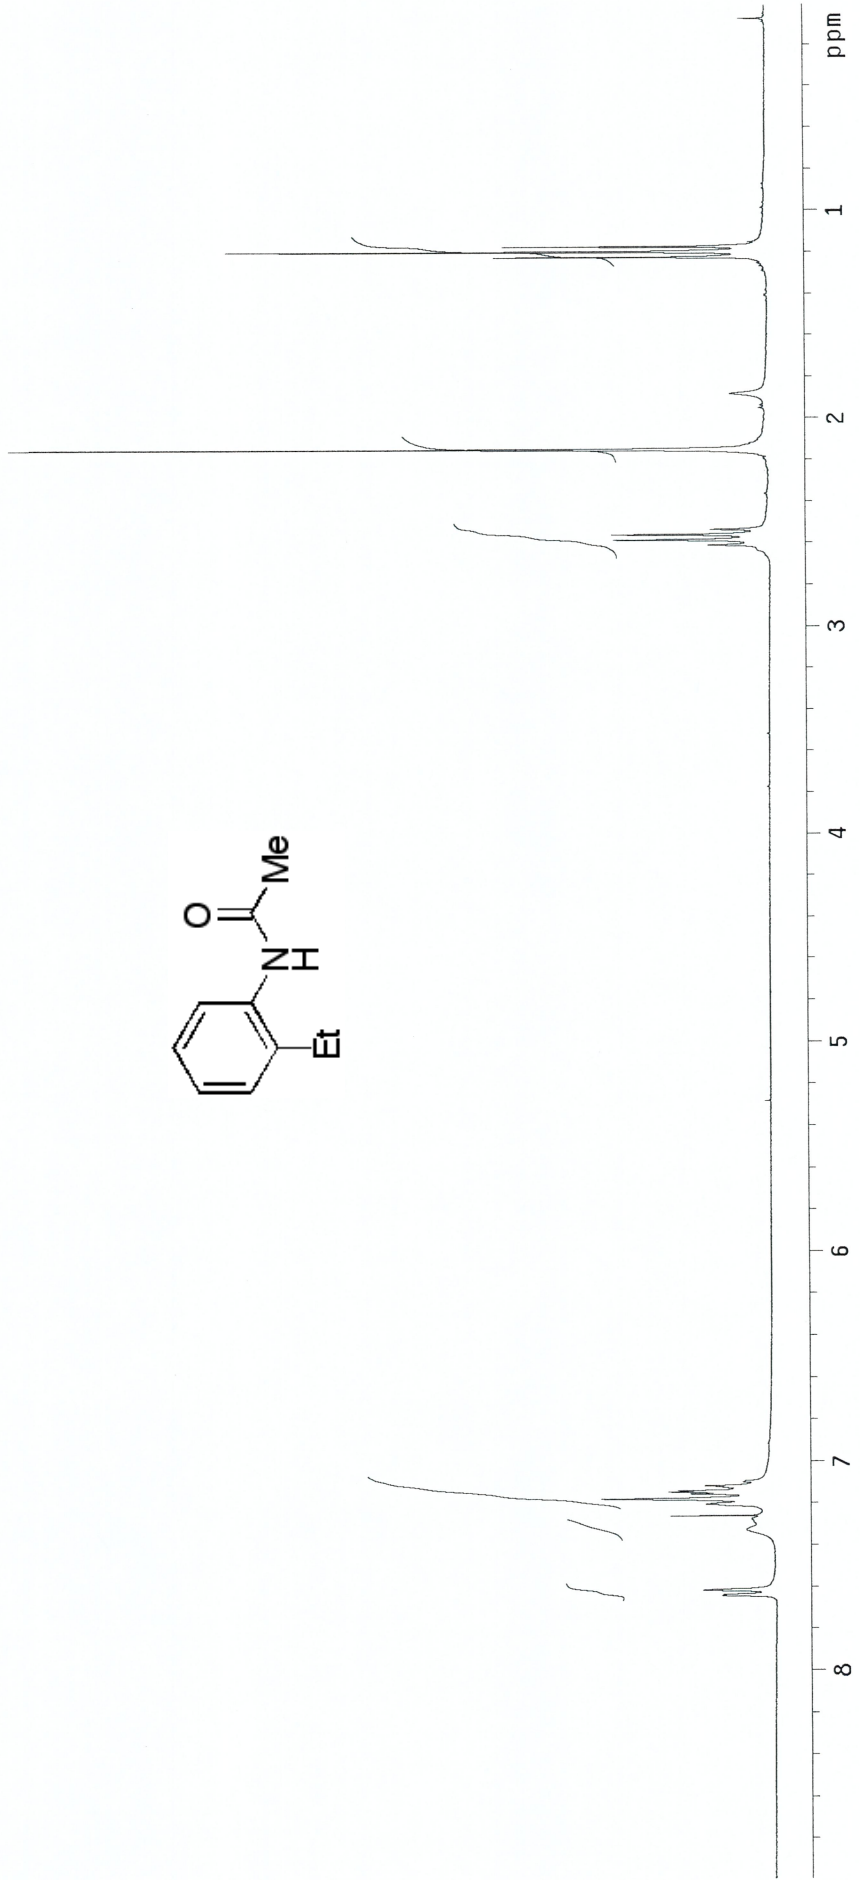

KD110

Pulse Sequence: s2pu1

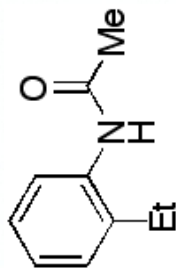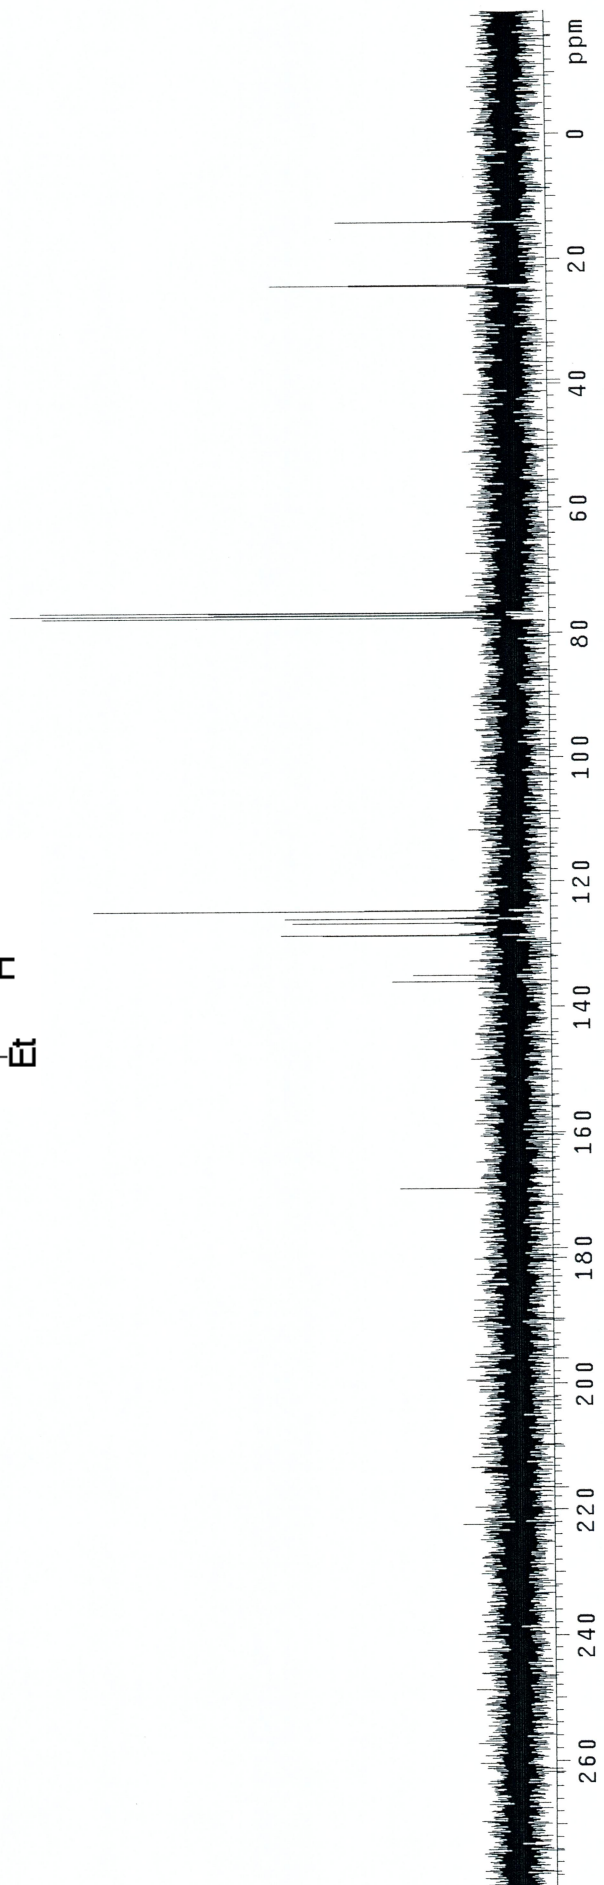



KD107B

Pulse Sequence: s2pu1

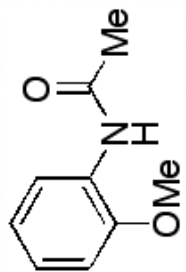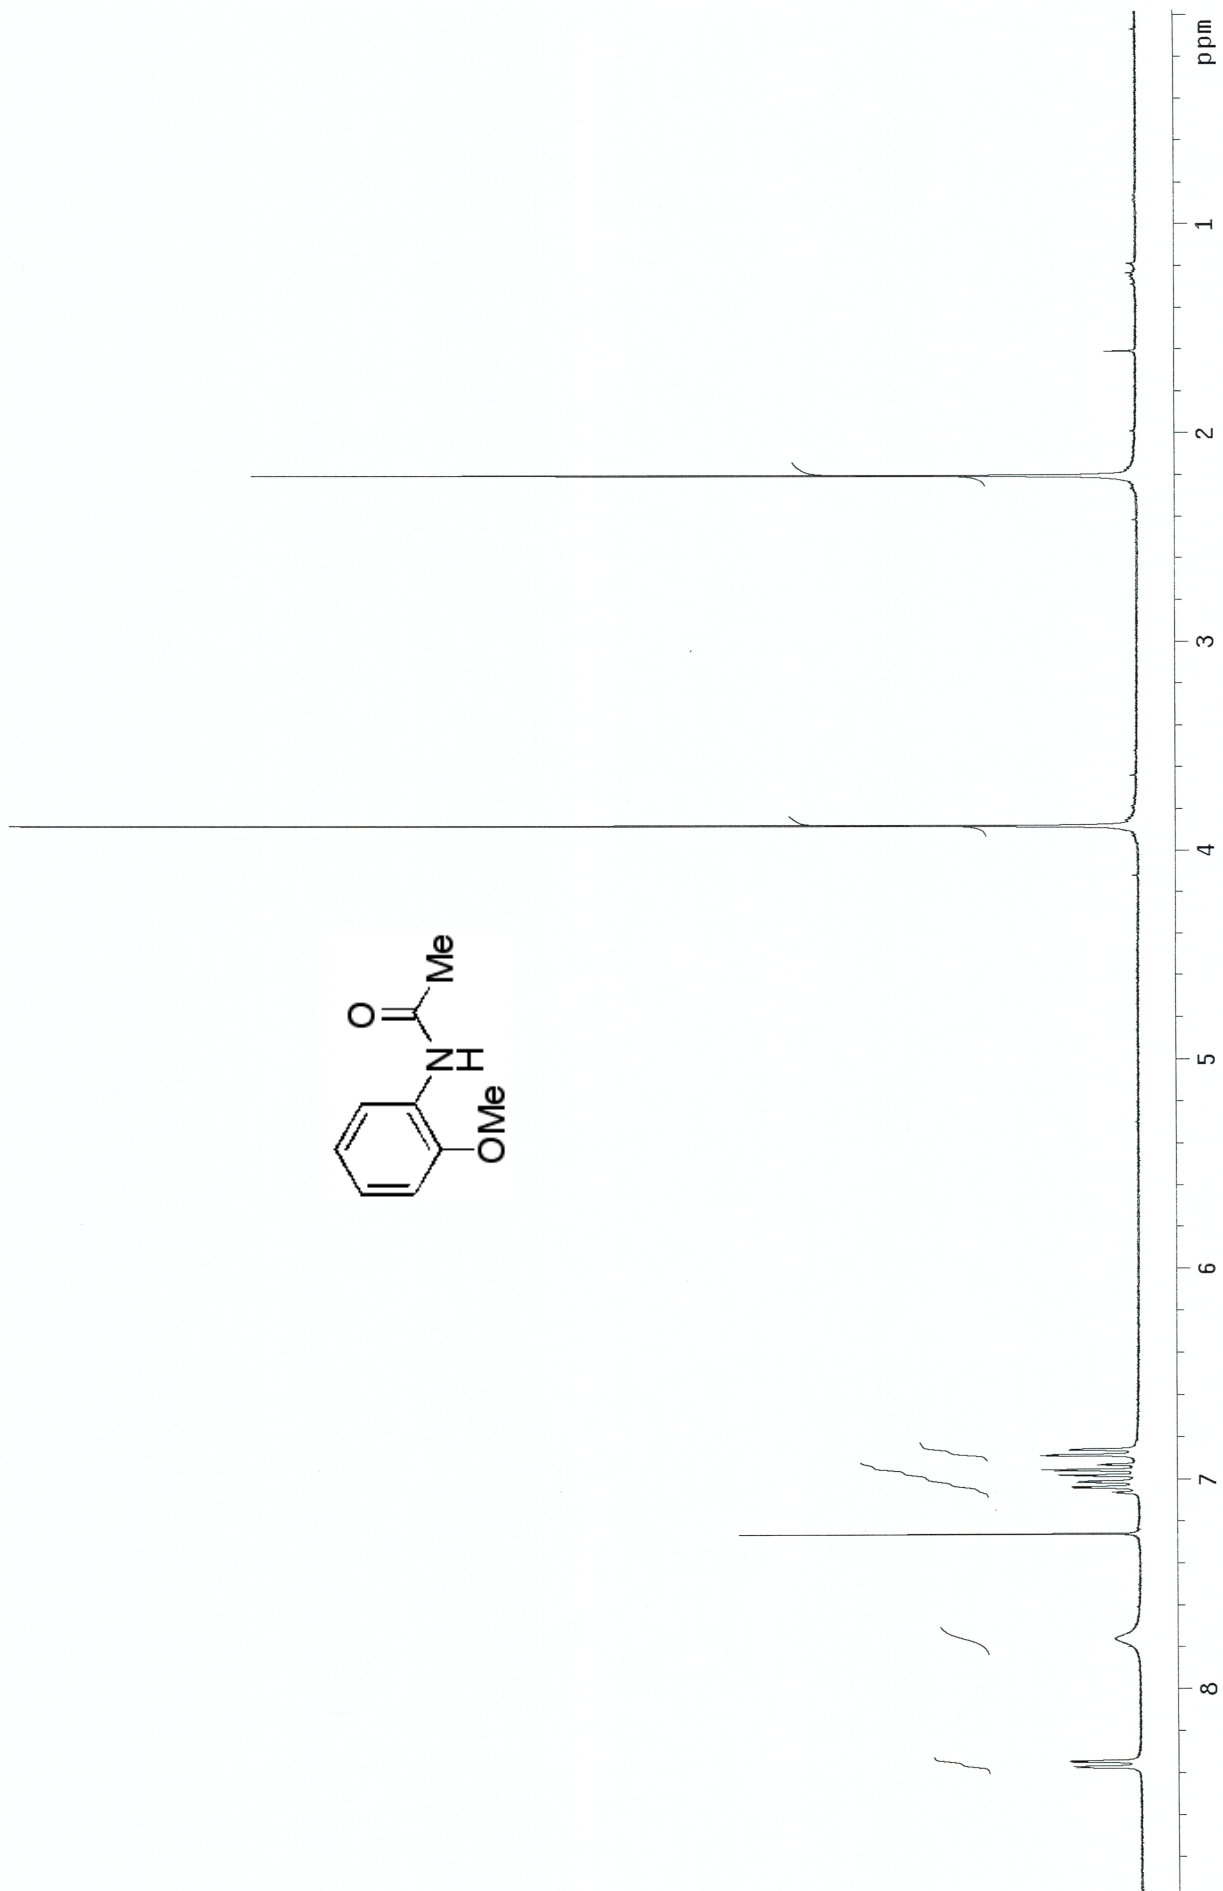



KD103

Pulse Sequence: s2pu1

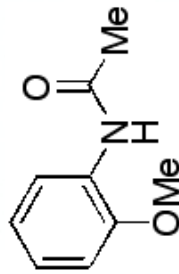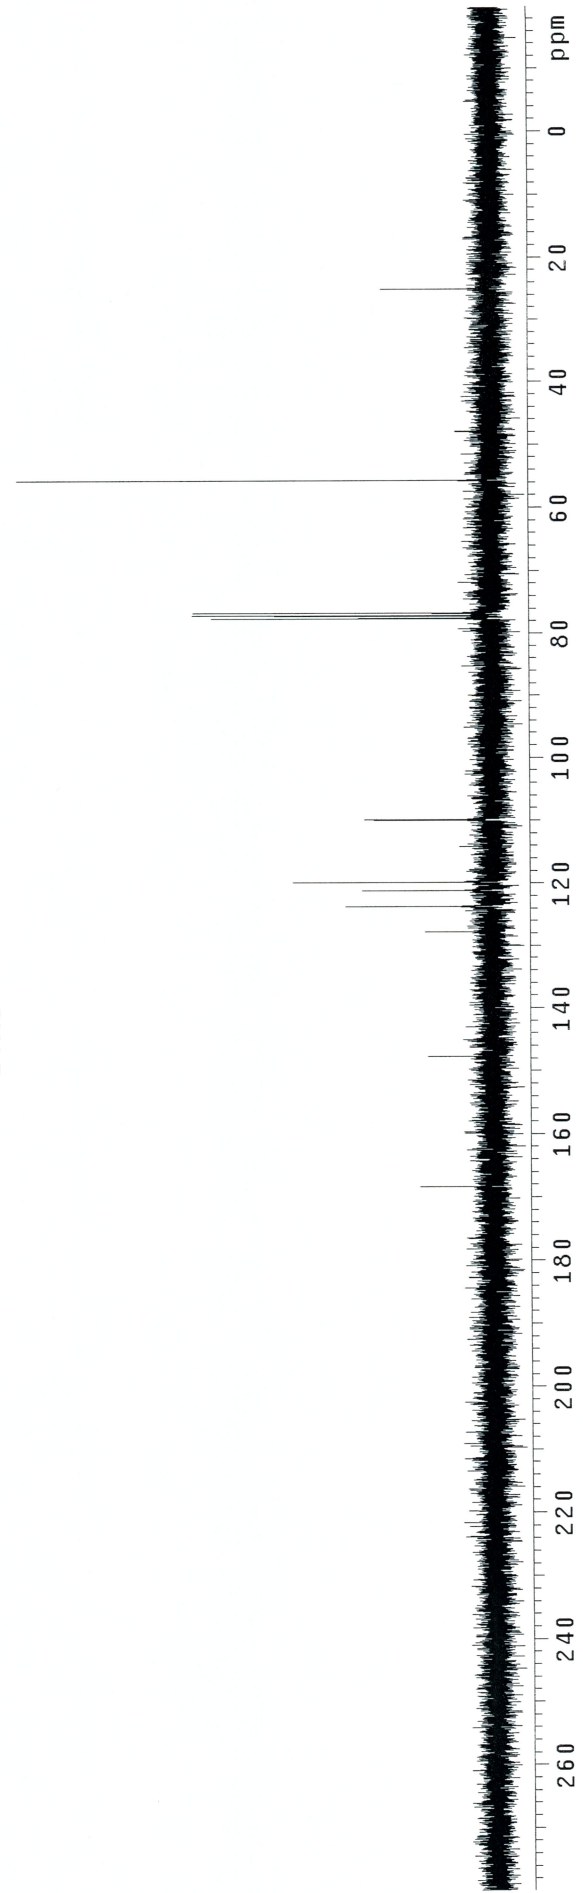

KD75

Pulse Sequence: s2pu1

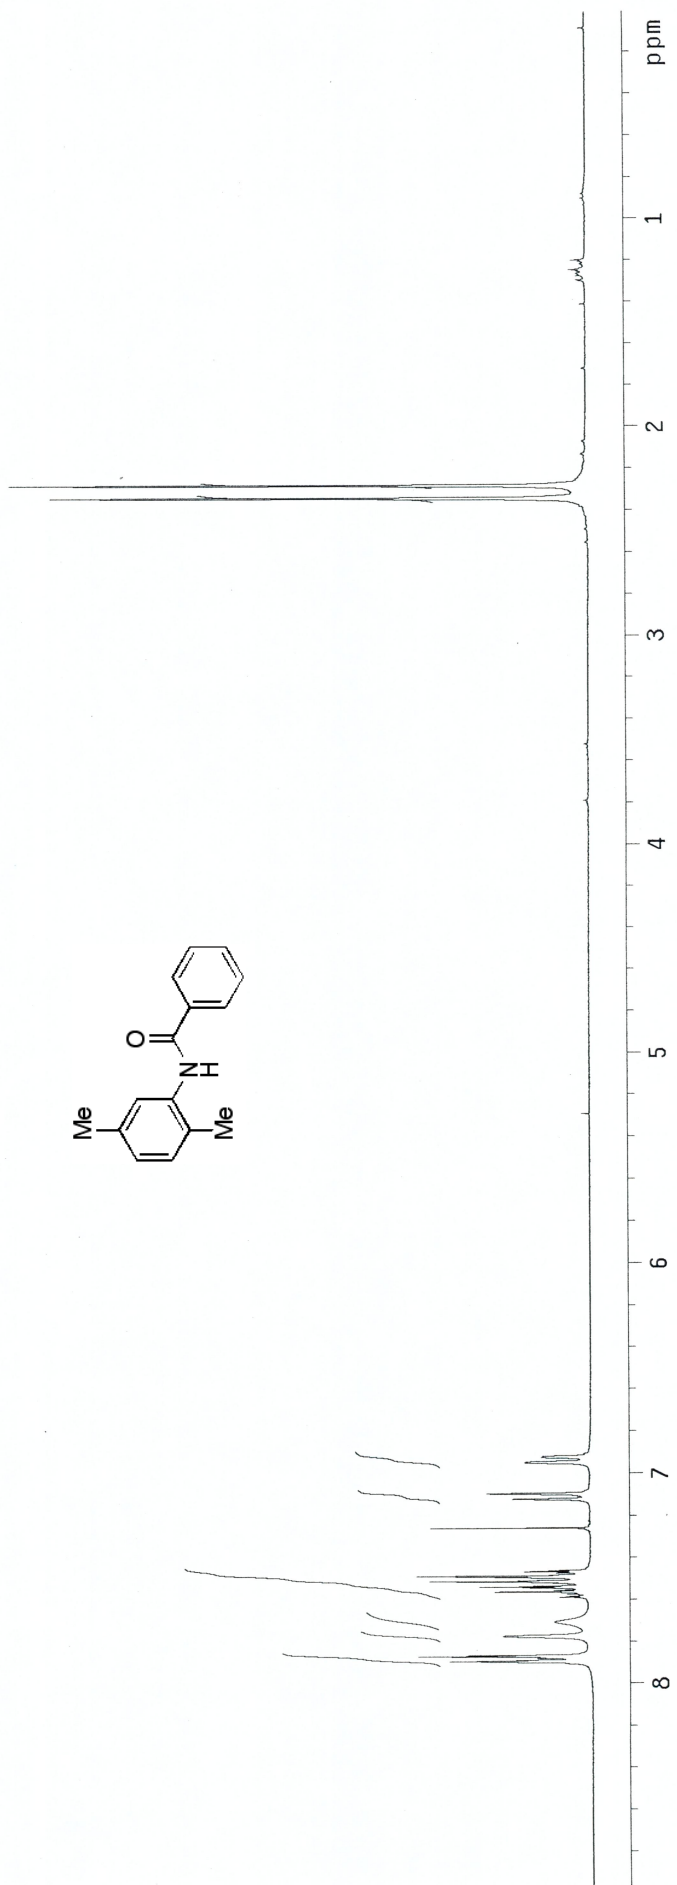

KD75

Pulse Sequence: s2pu1

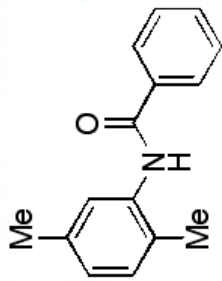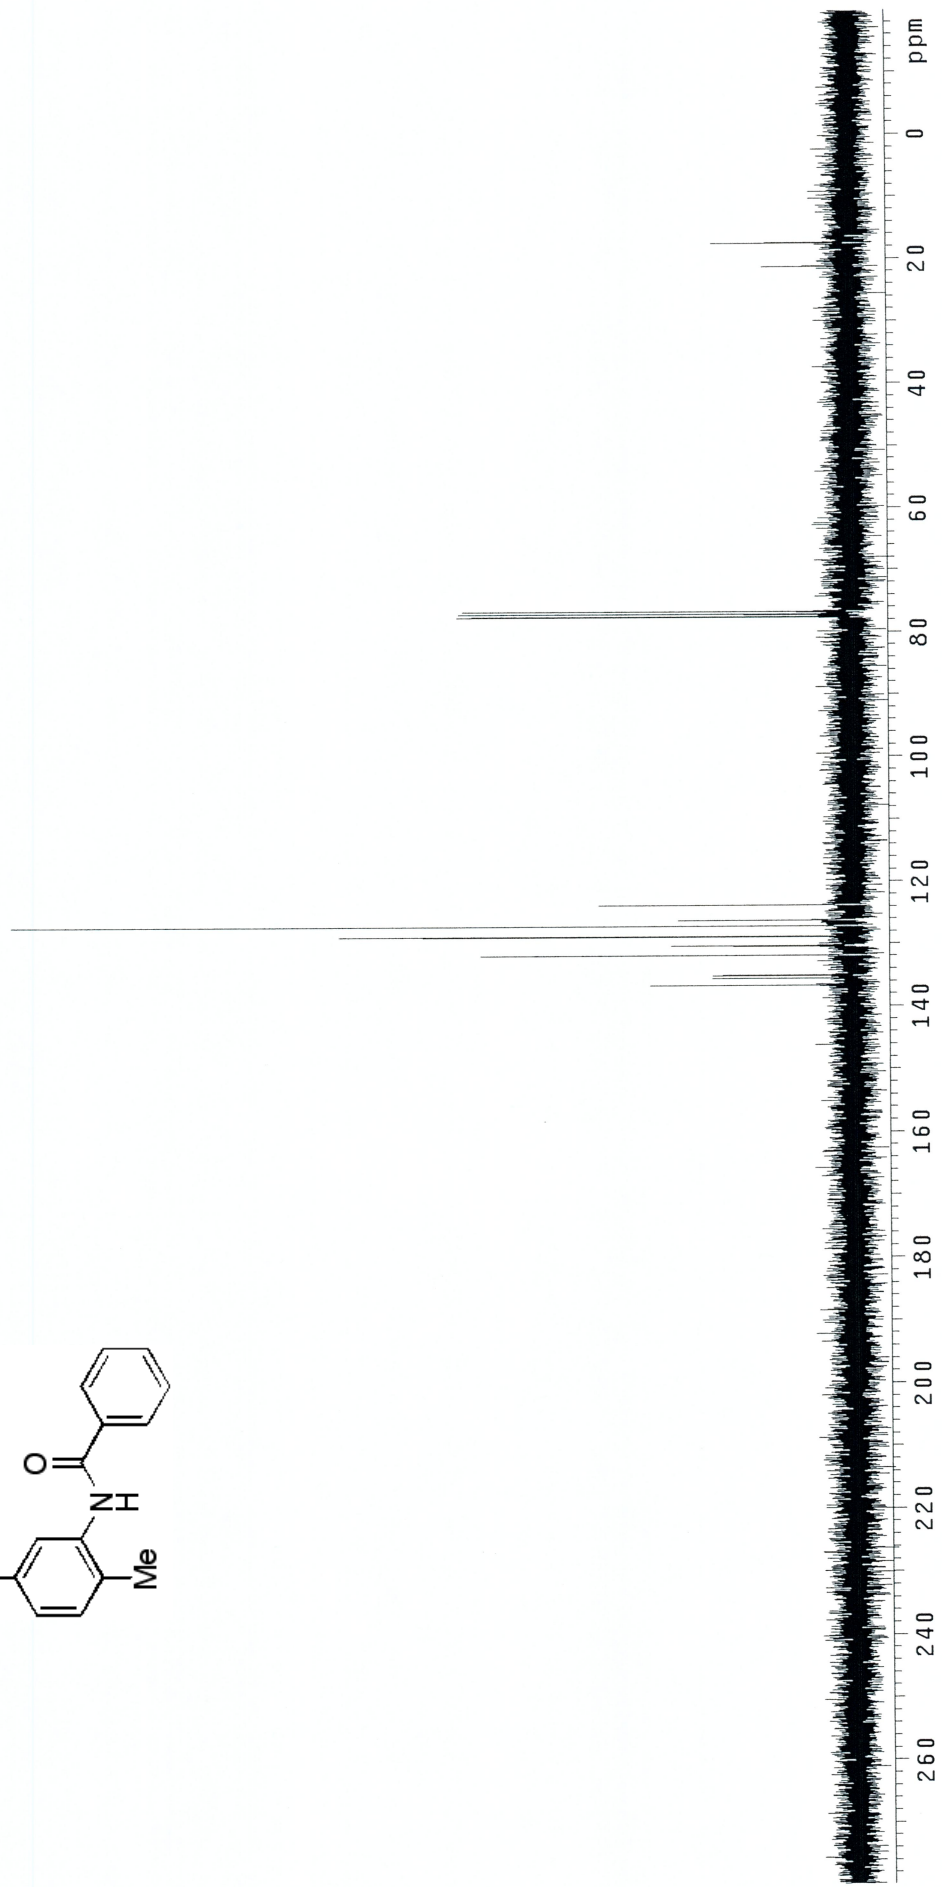

KD97A

Pulse Sequence: s2pu1

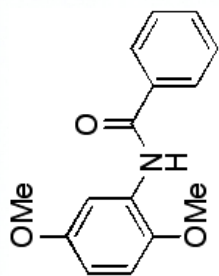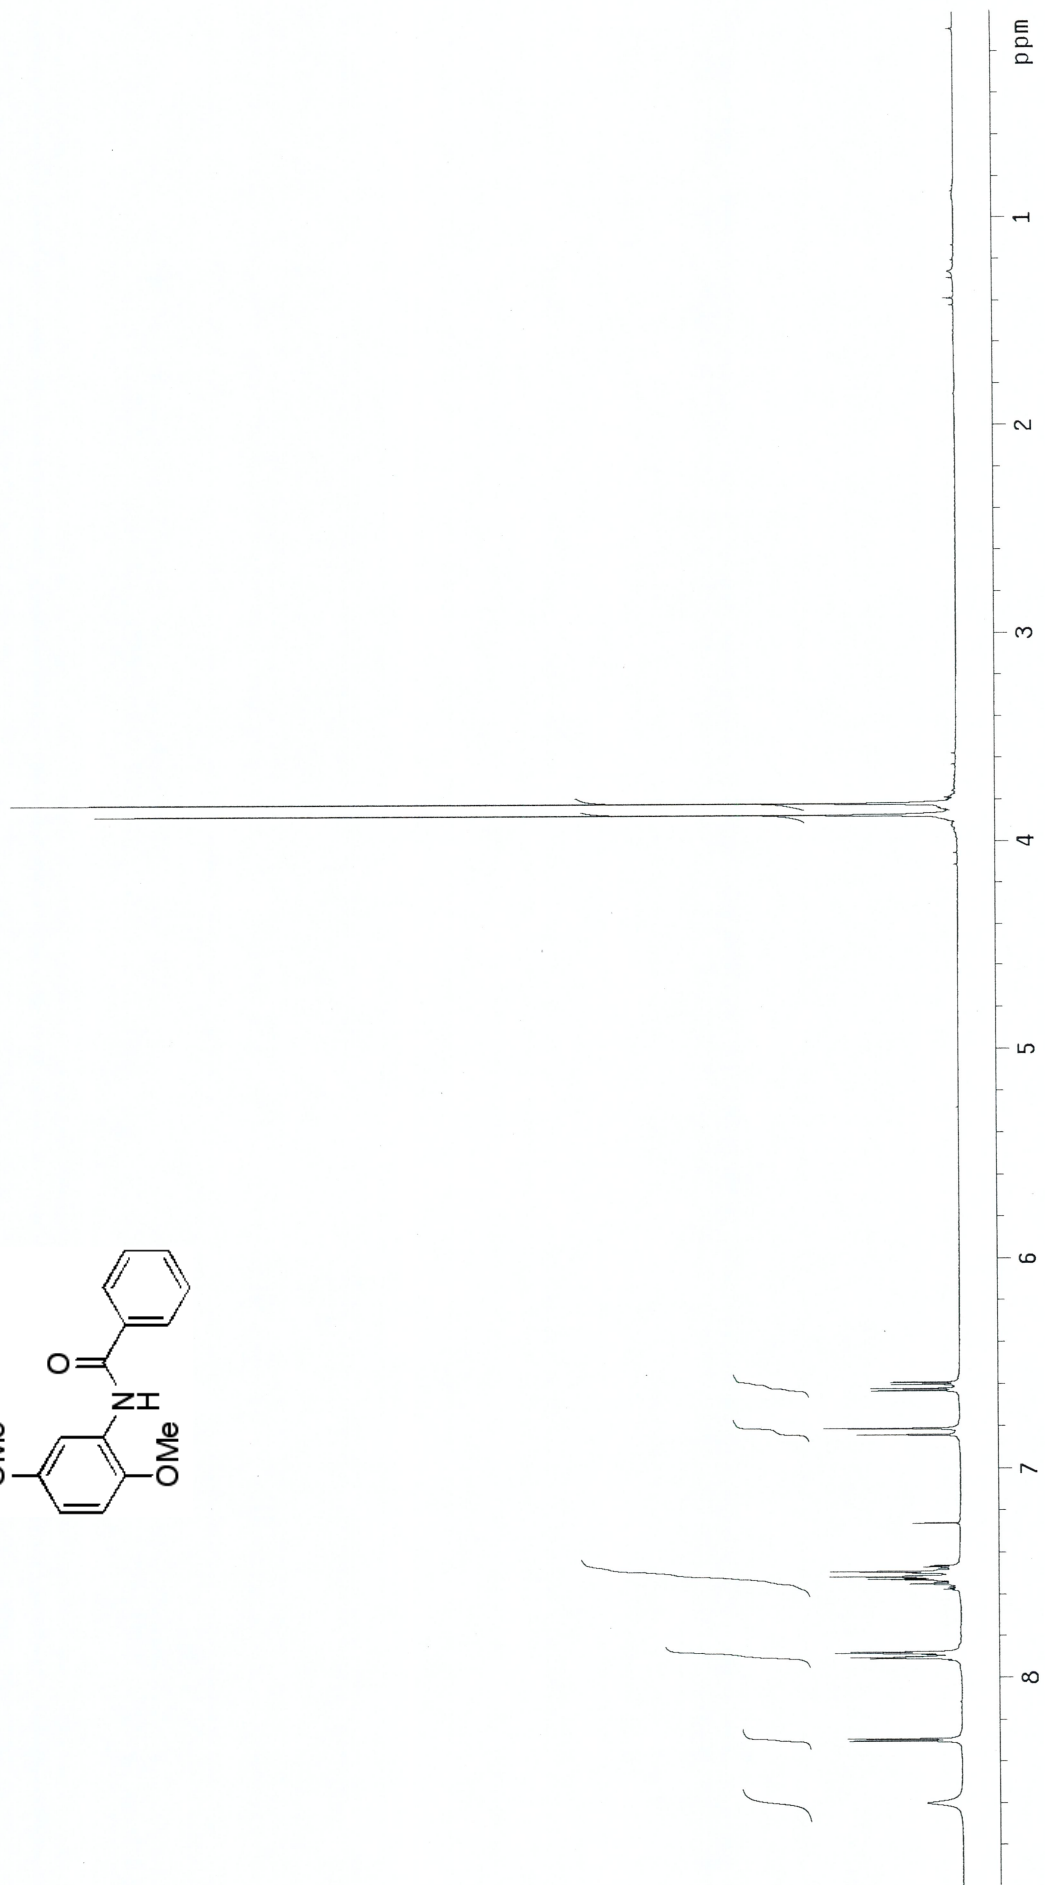

KD97A

Pu1se Sequence: s2pu1

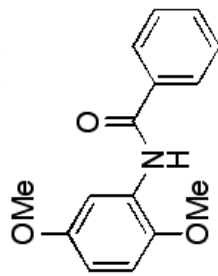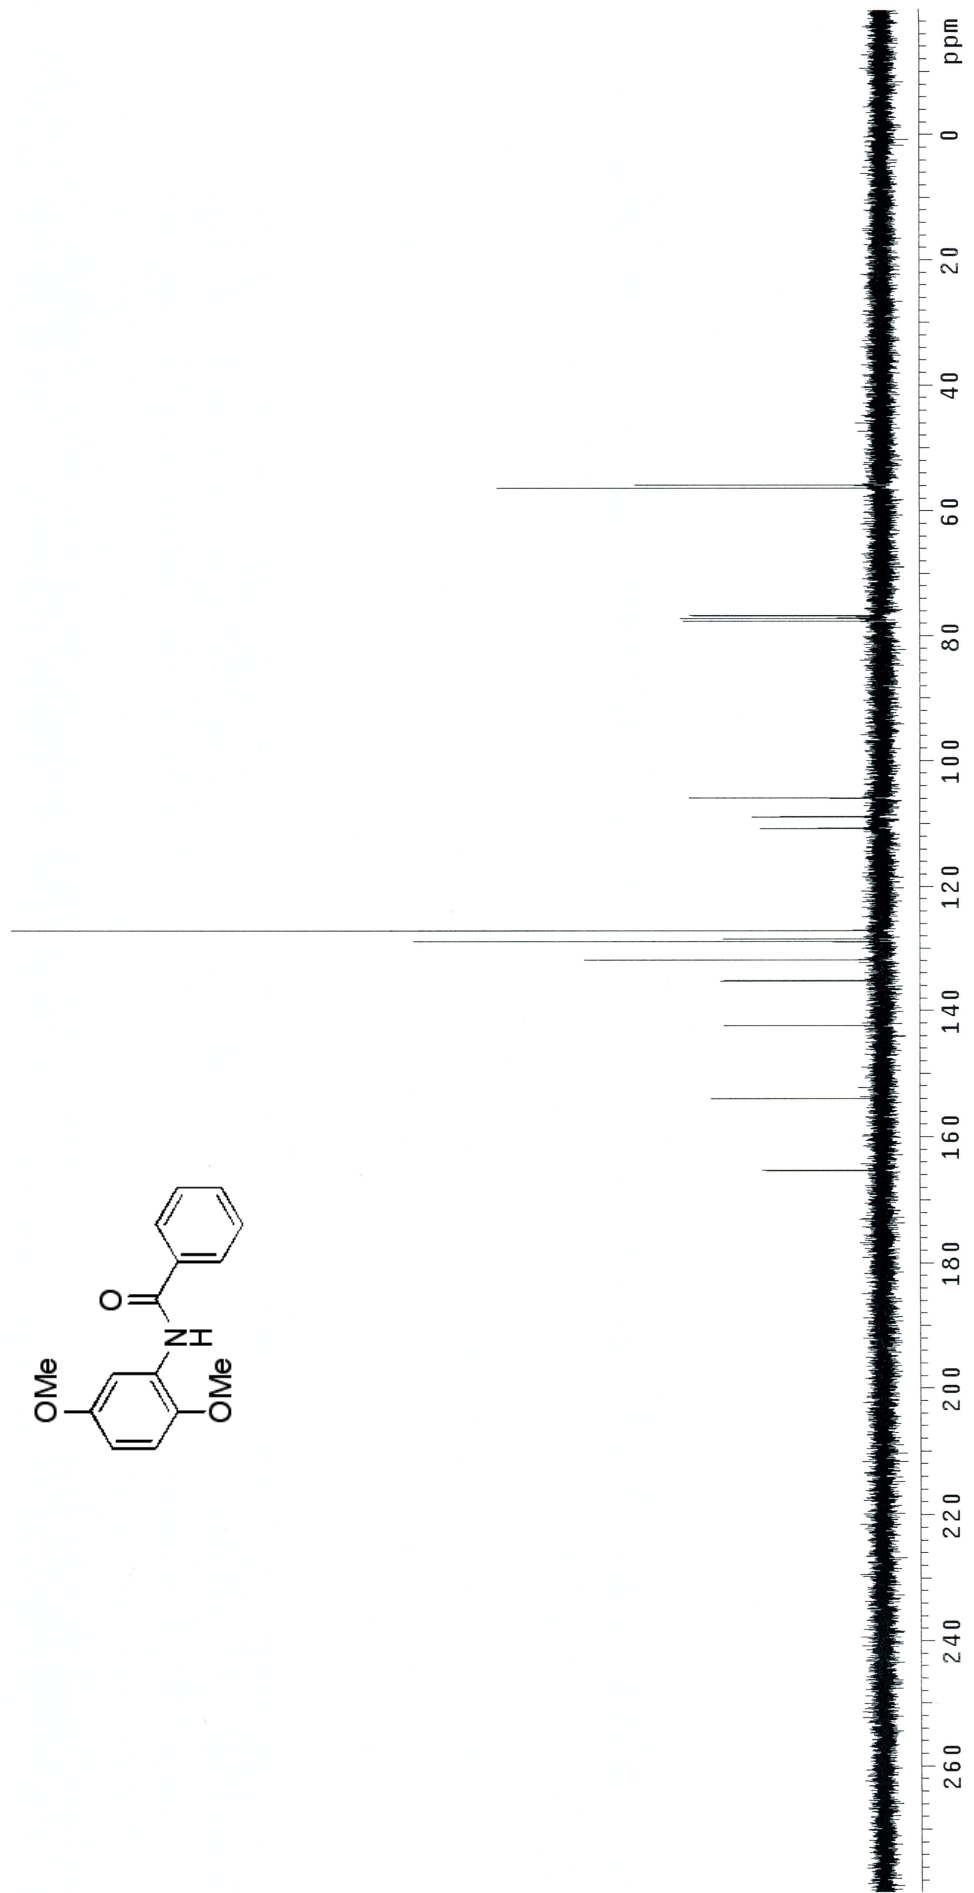



K0129

Pulse Sequence: s2pu1

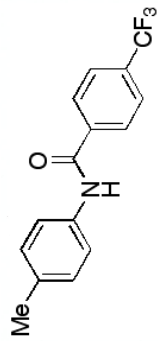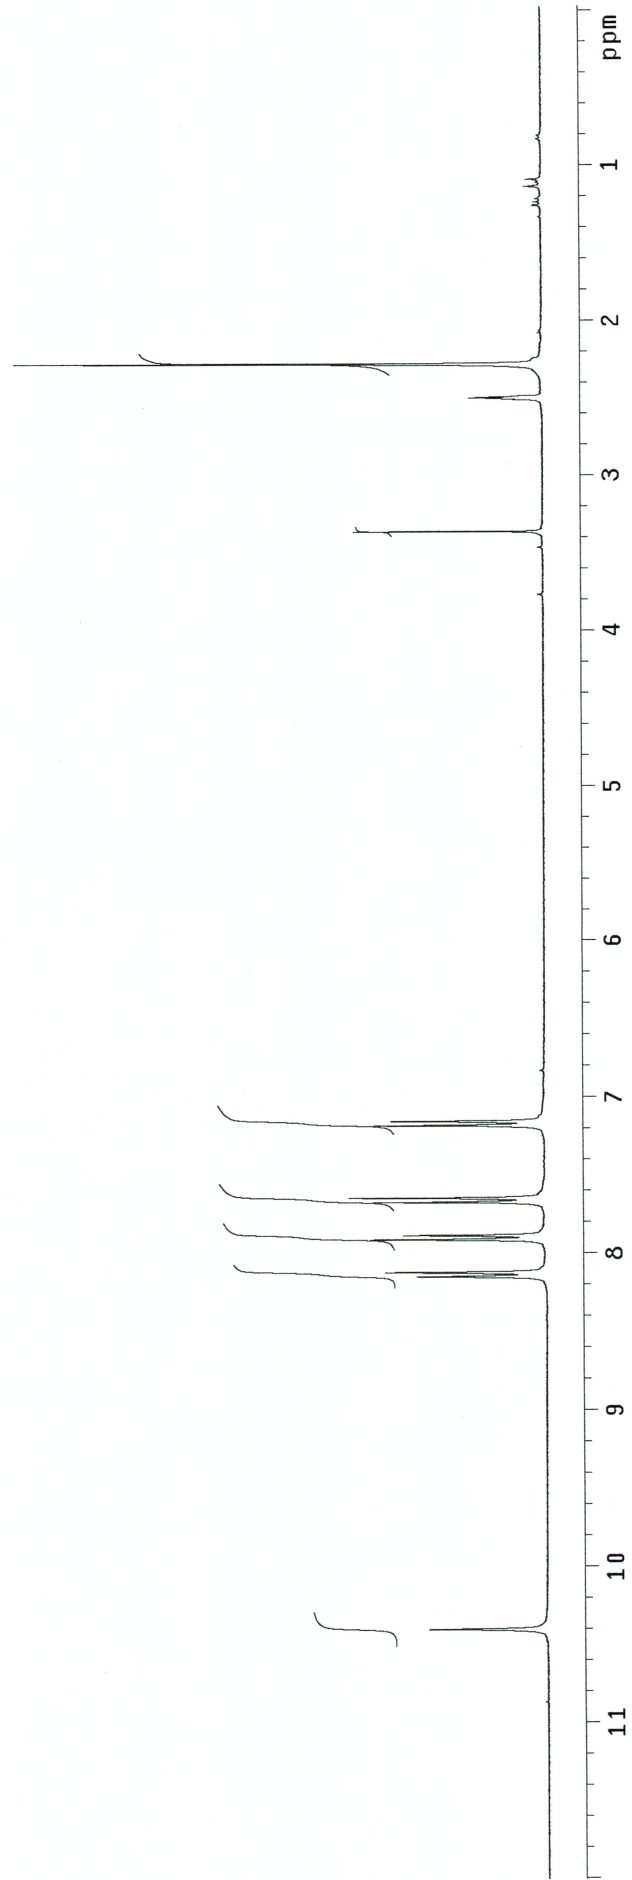

KD129

Pulse Sequence: s2pu1

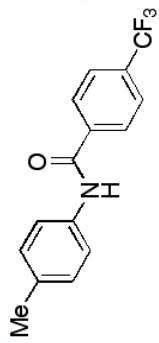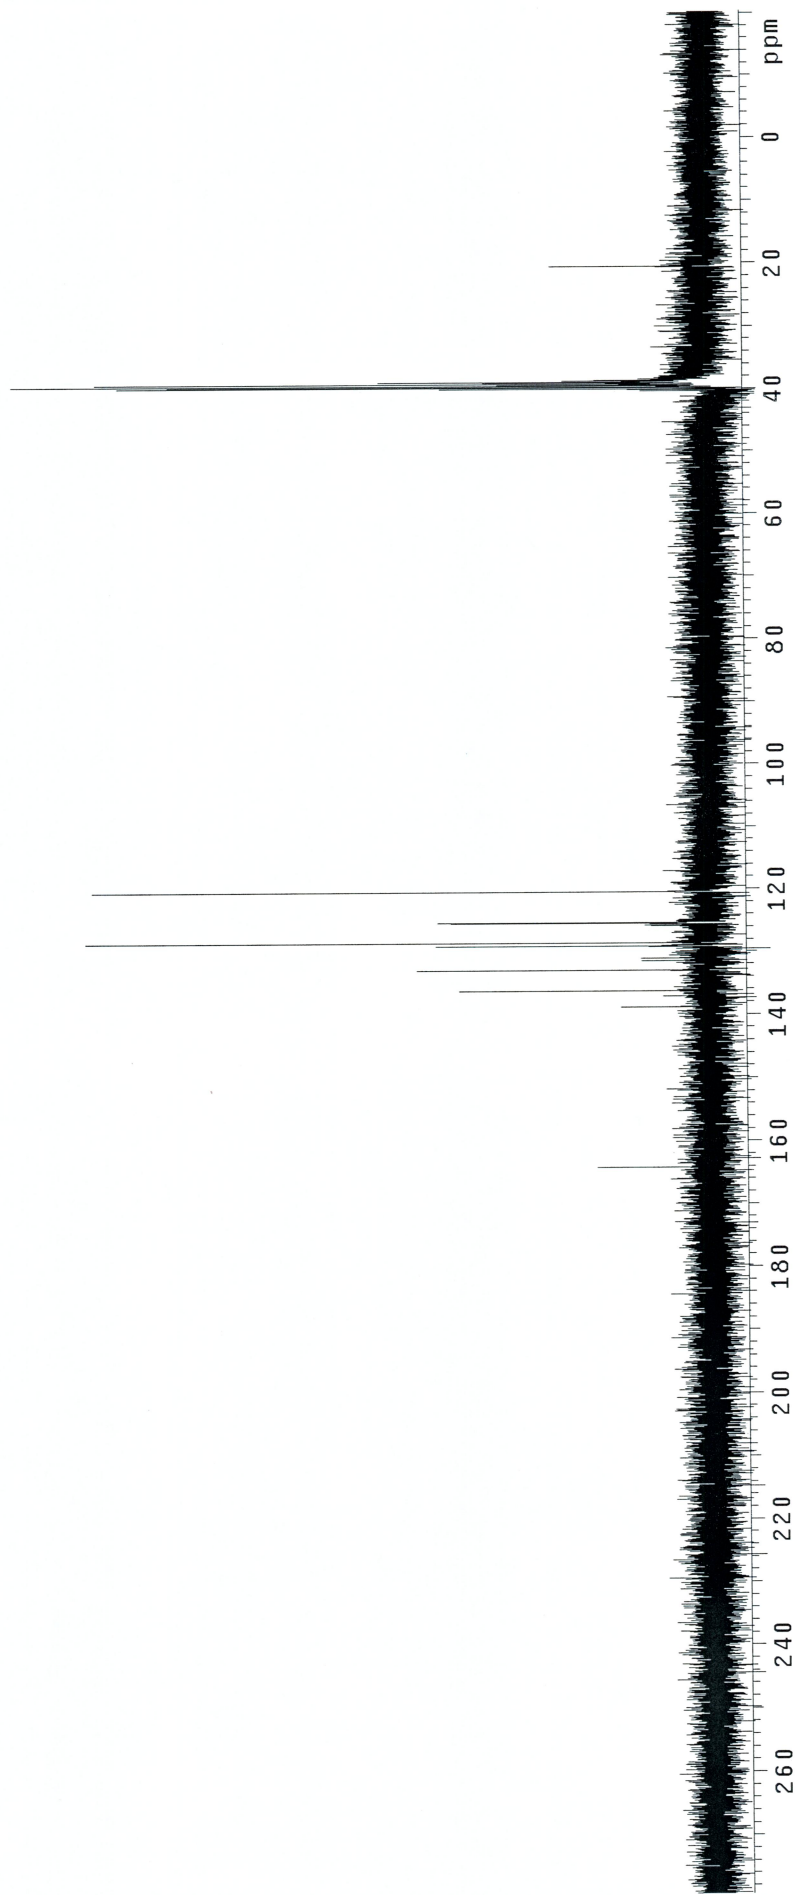

KD95

Pulse Sequence: s2pu1

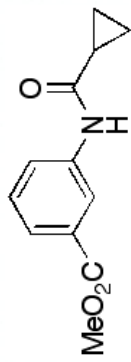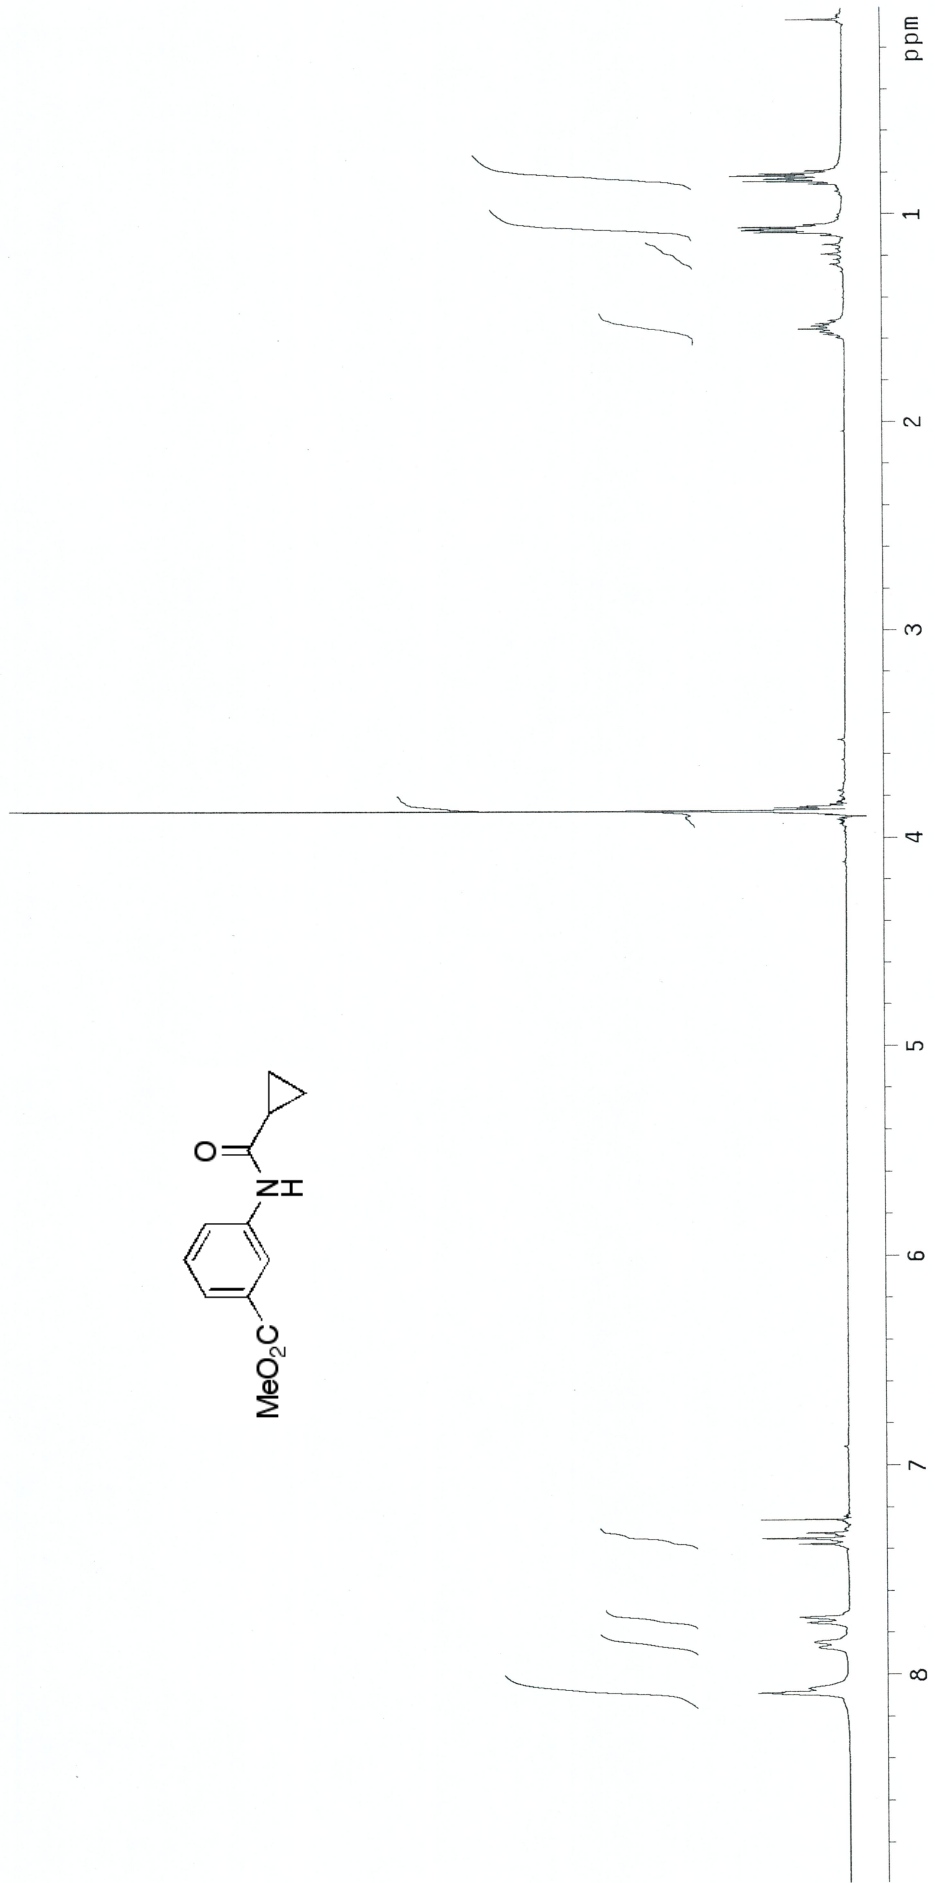

K095

Pulse Sequence: s2pu1

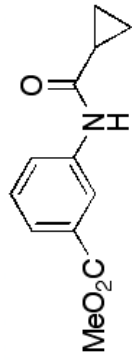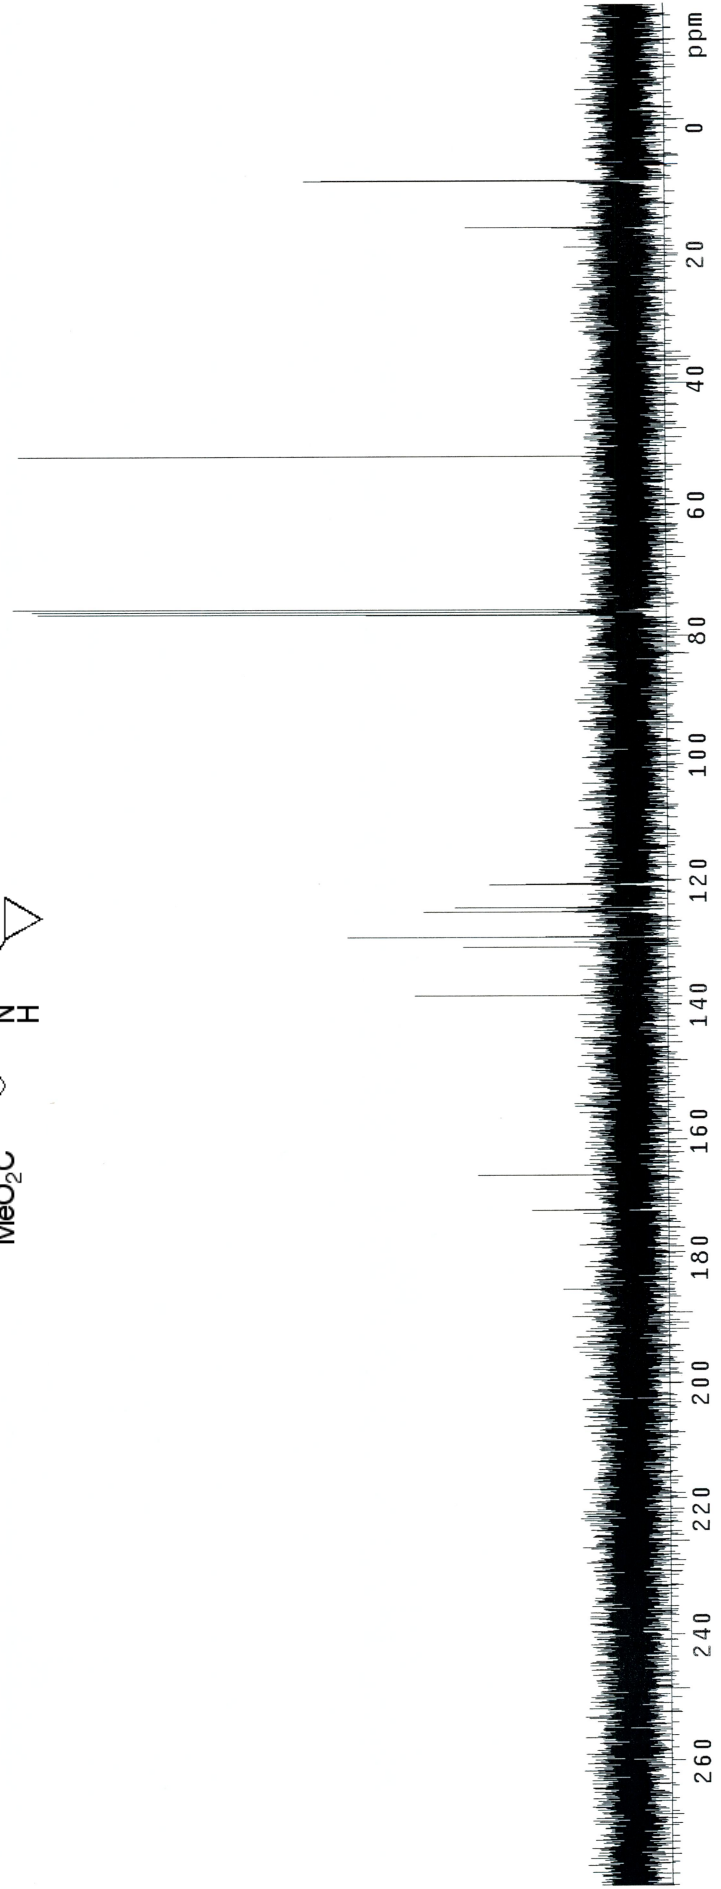

KD106

Pulse Sequence: s2pu1

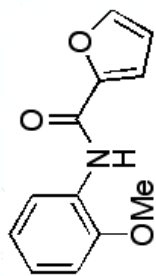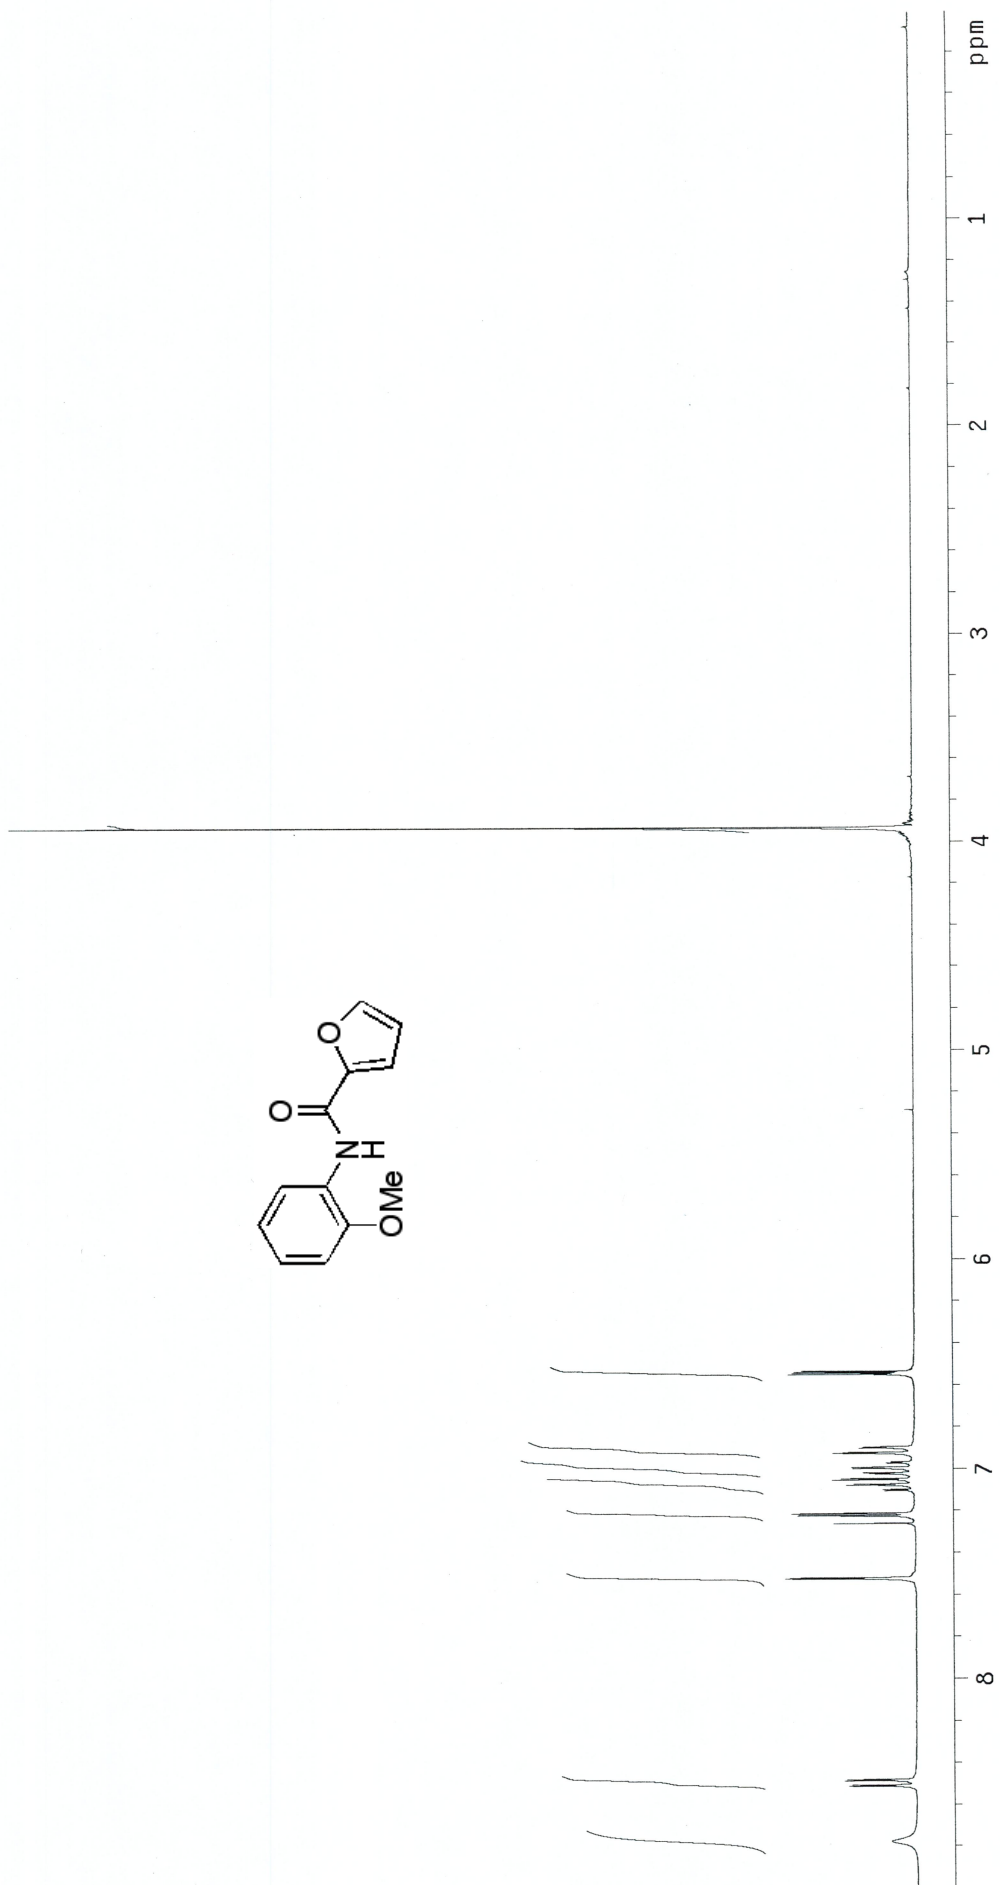



KD106

Pulse Sequence: s2pu1

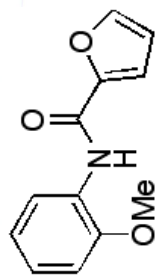

SI 20

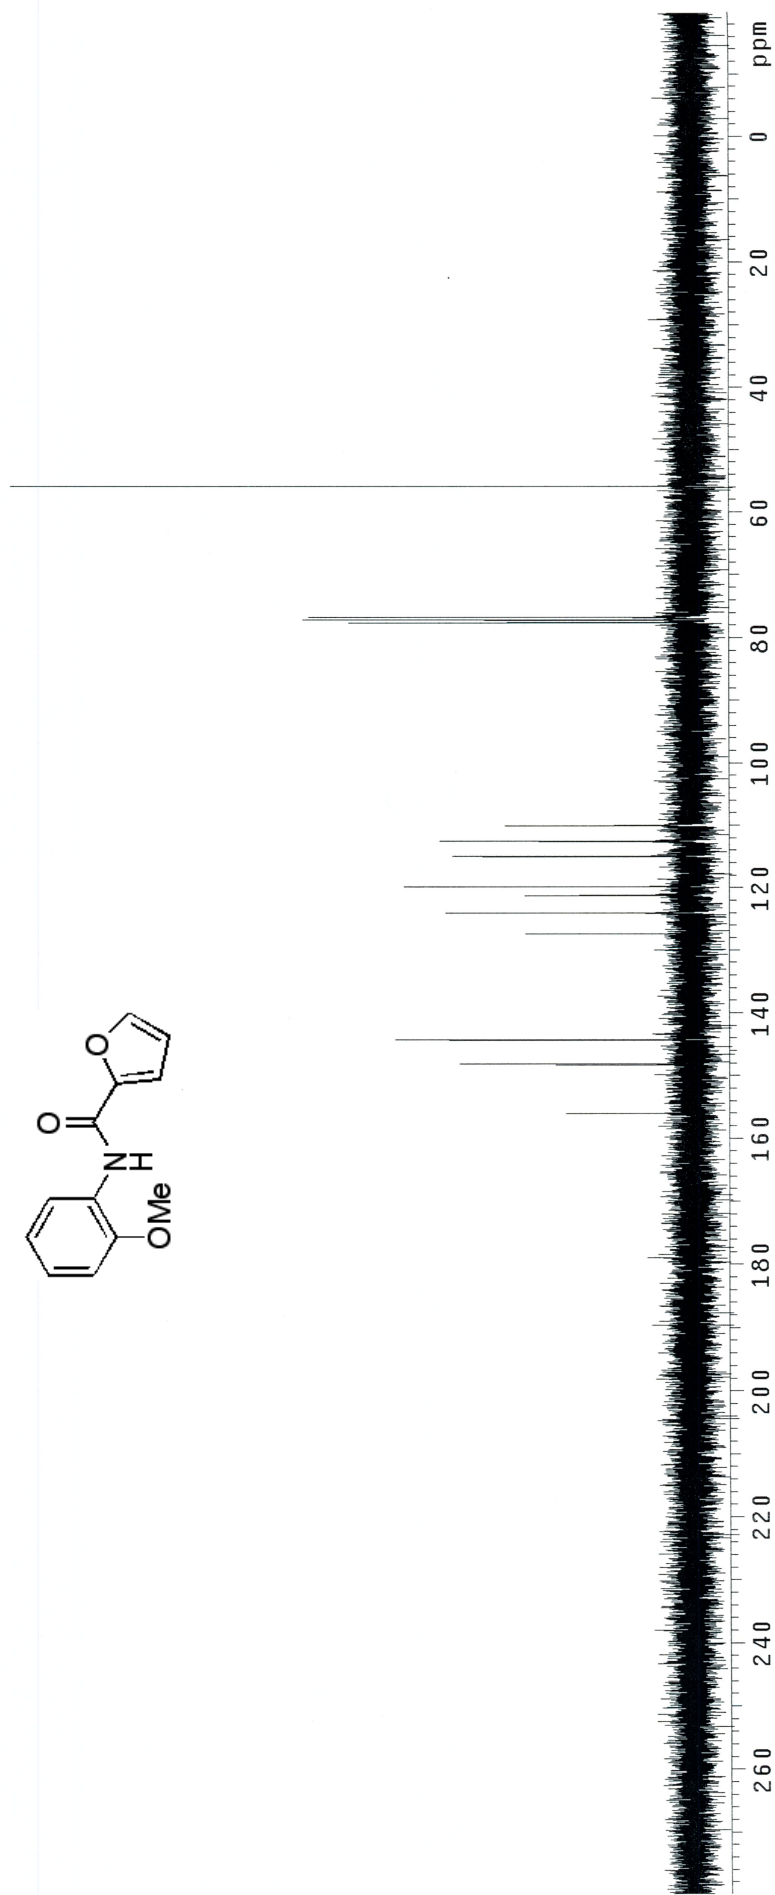

KD125B

PuTse Sequence: s2pu1

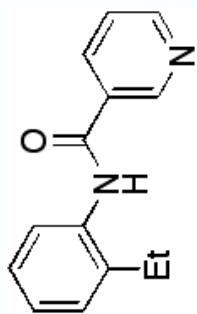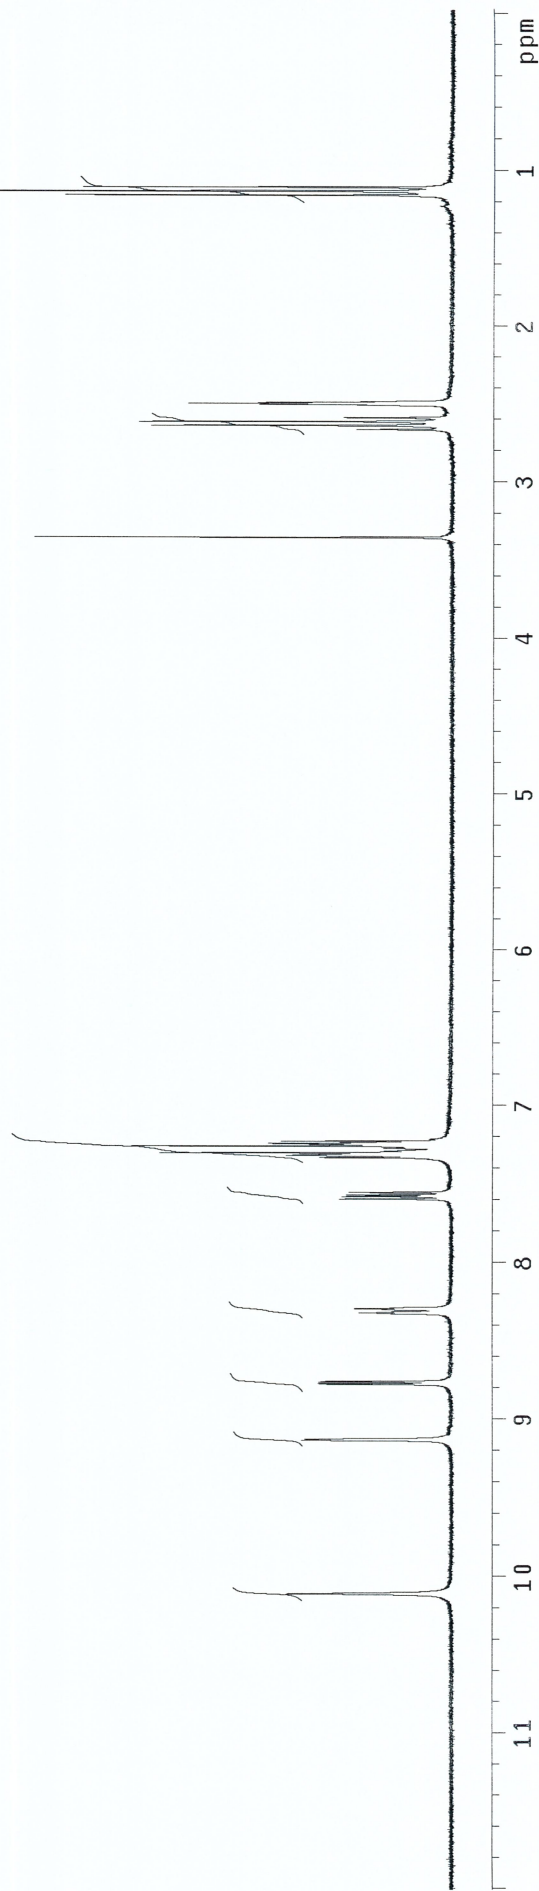

KD130

Pulse Sequence: s2pu1

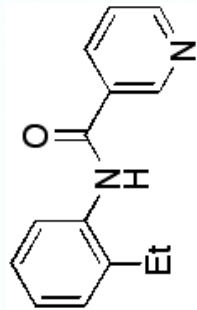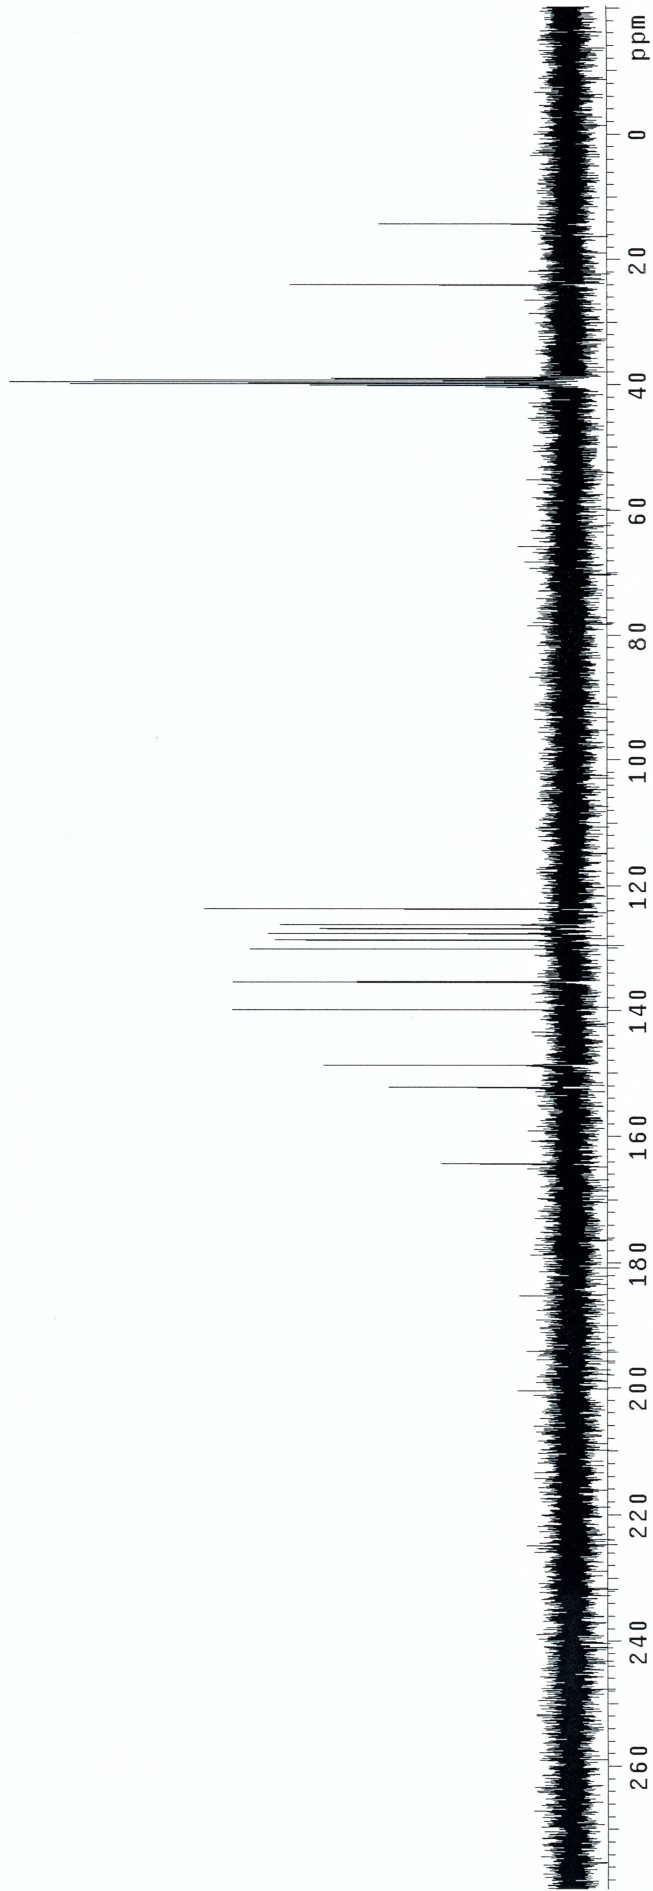

q1228-H-2 1 1 Z: BCqzen

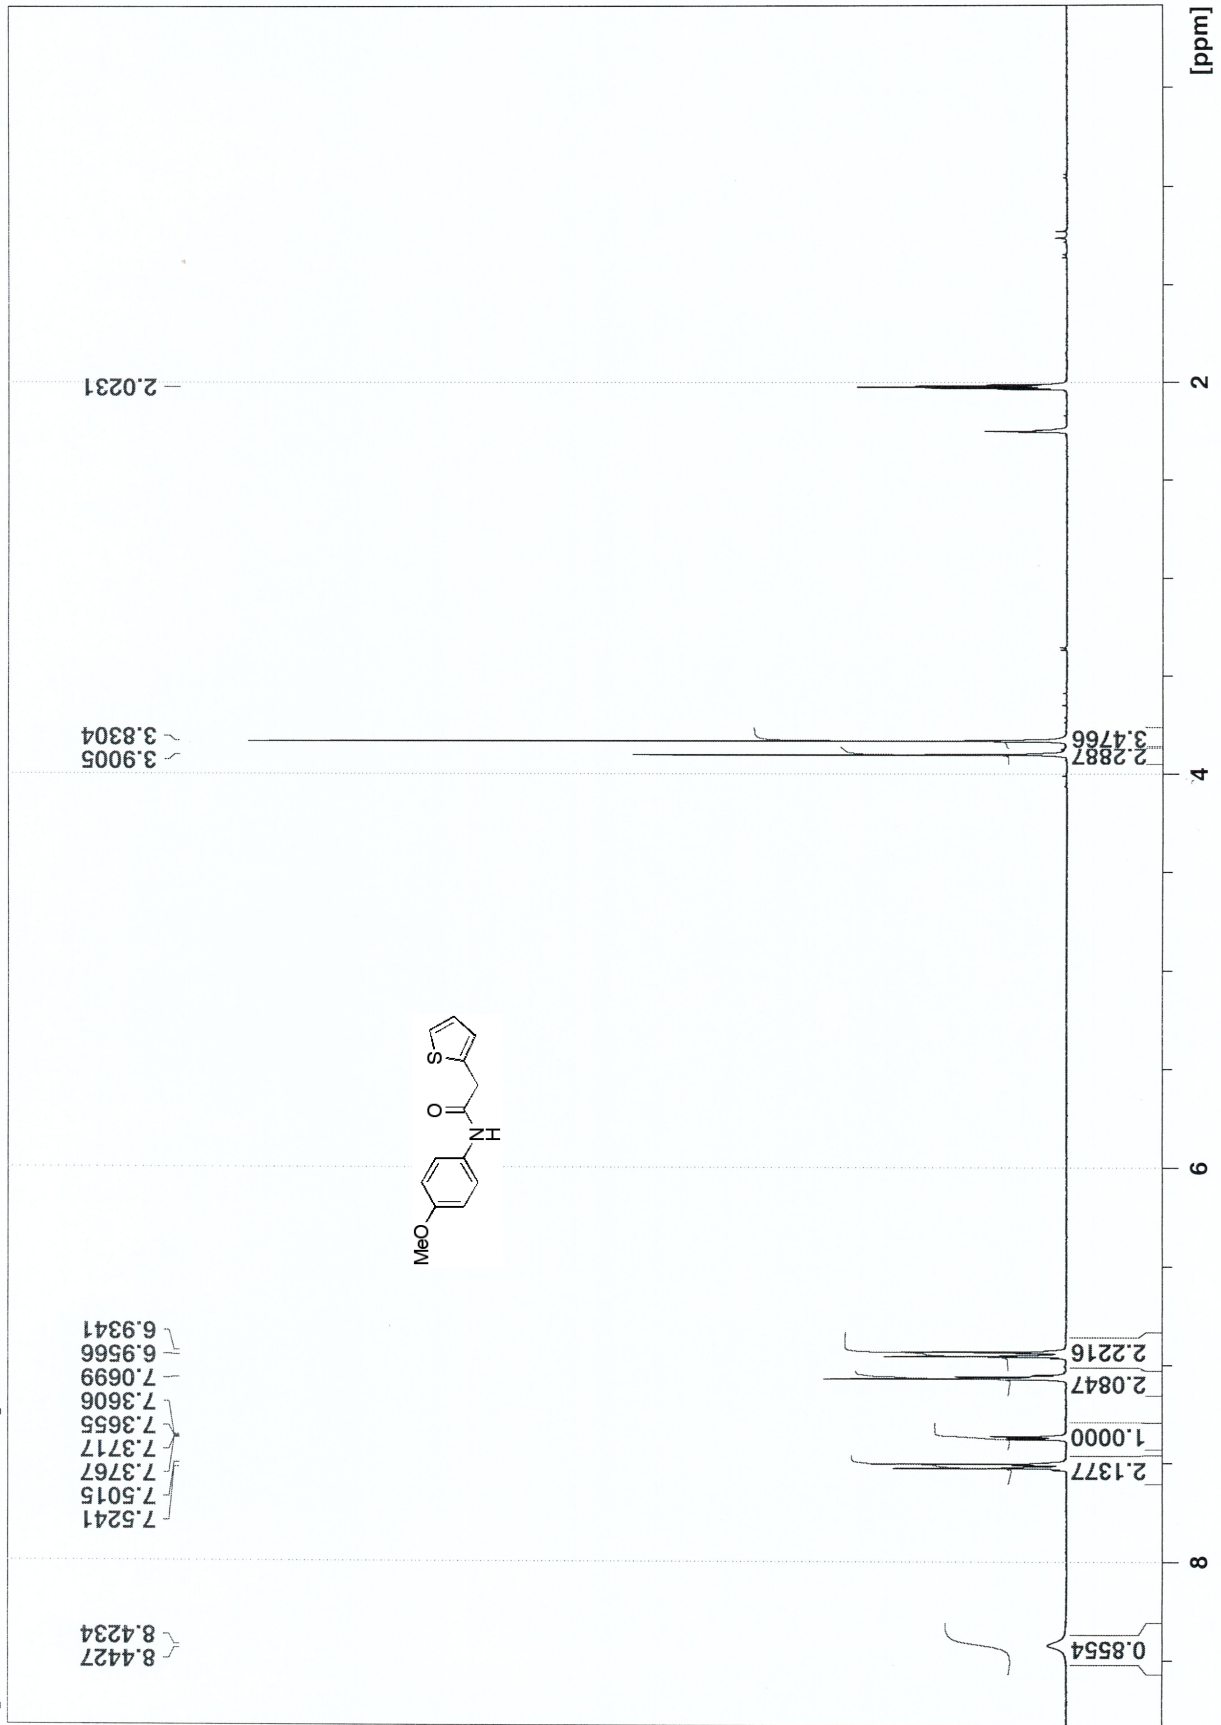



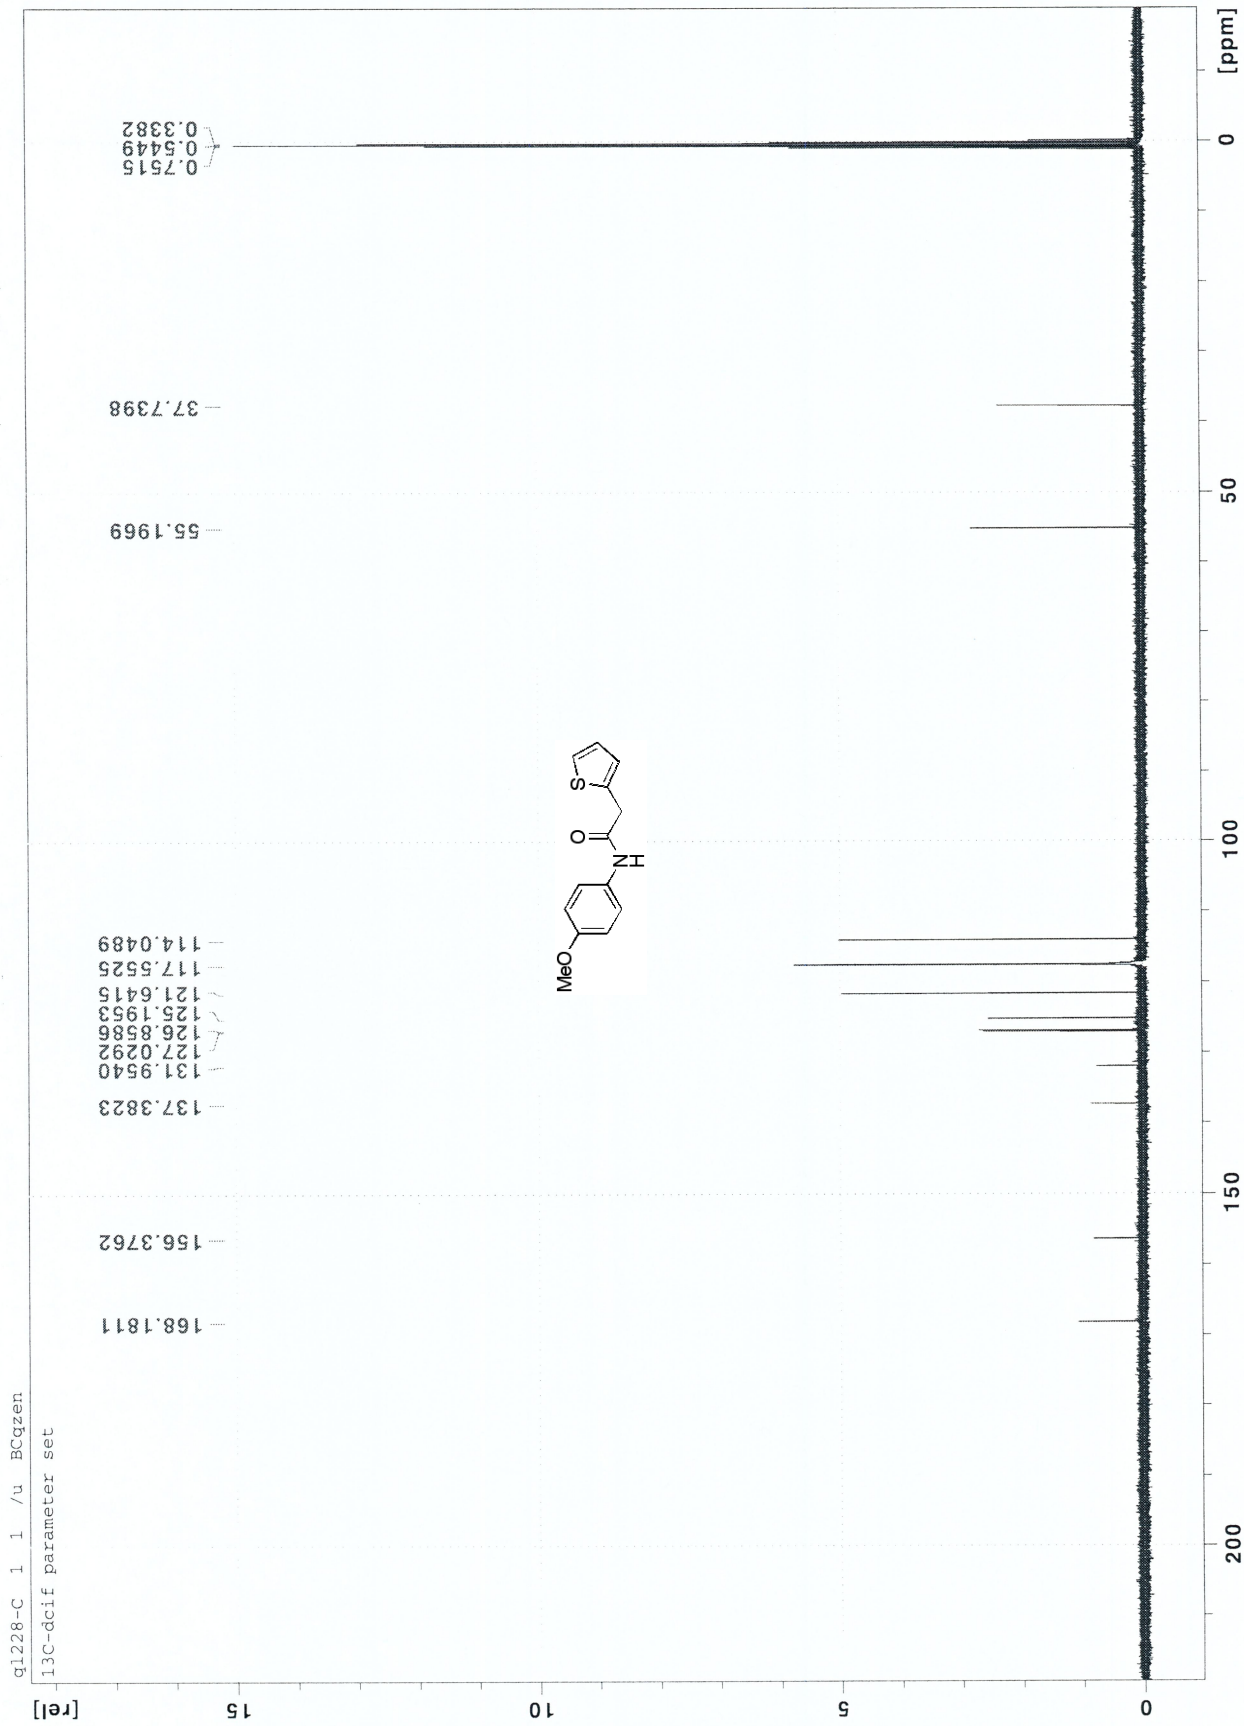



KD126A

Pulse Sequence: s2pu1

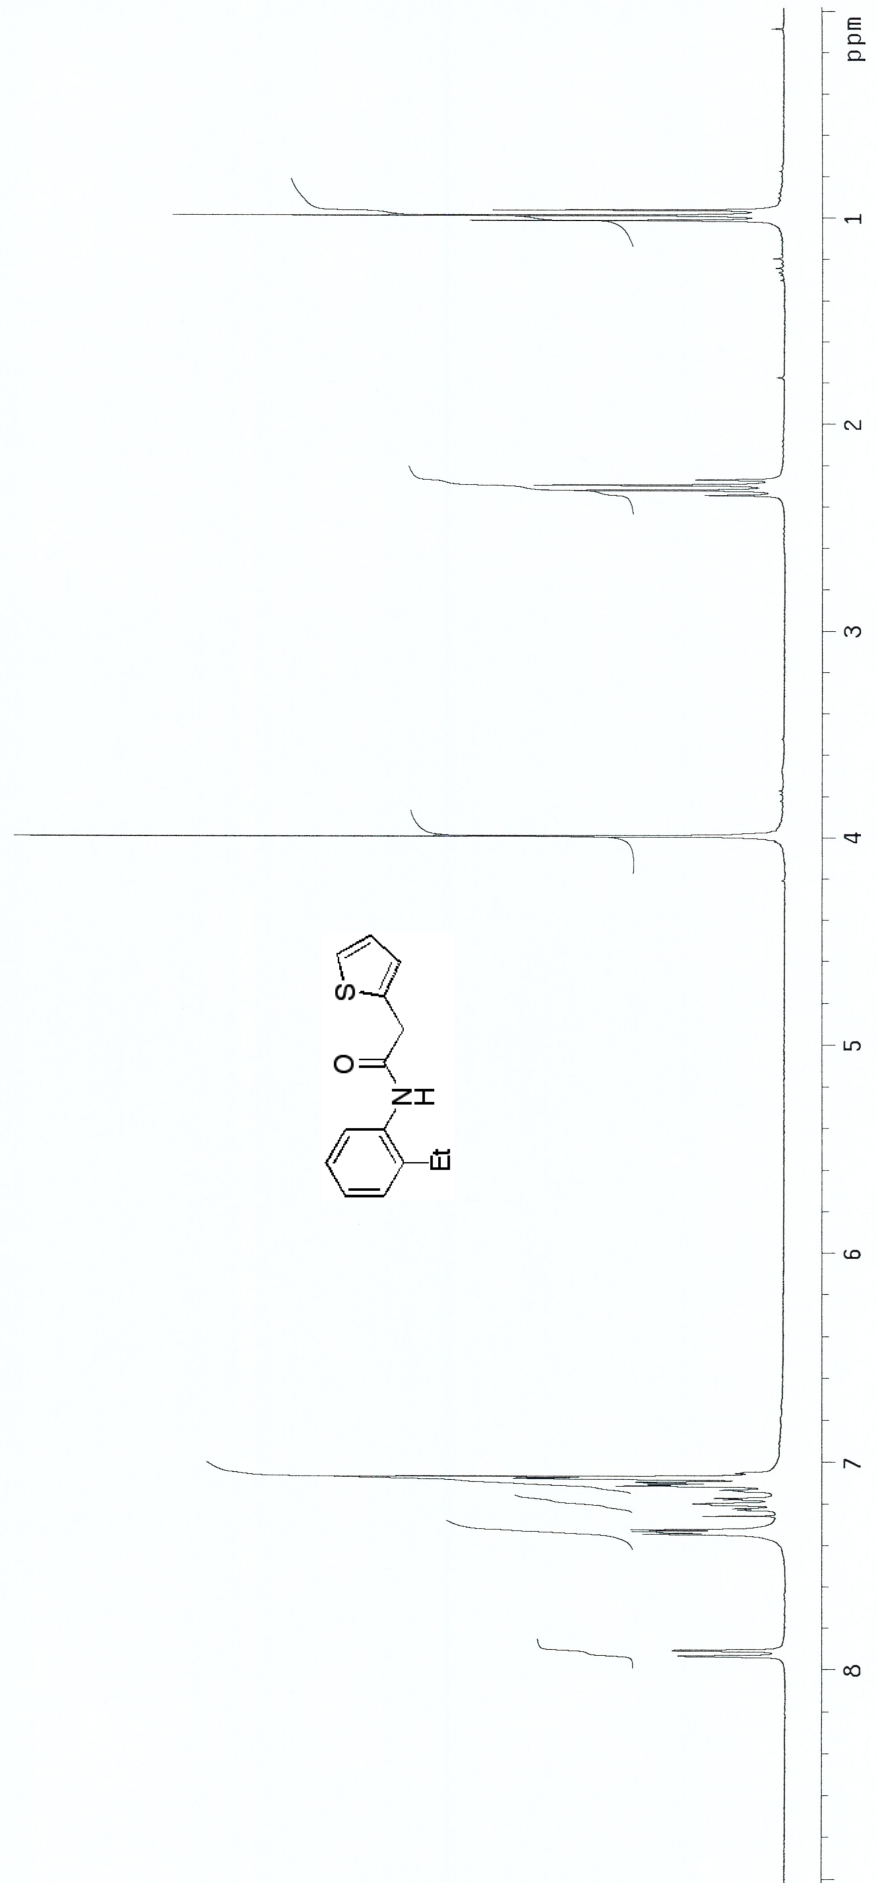

KD126A

Pulse Sequence: s2pu1

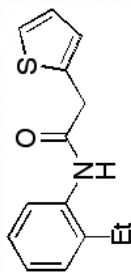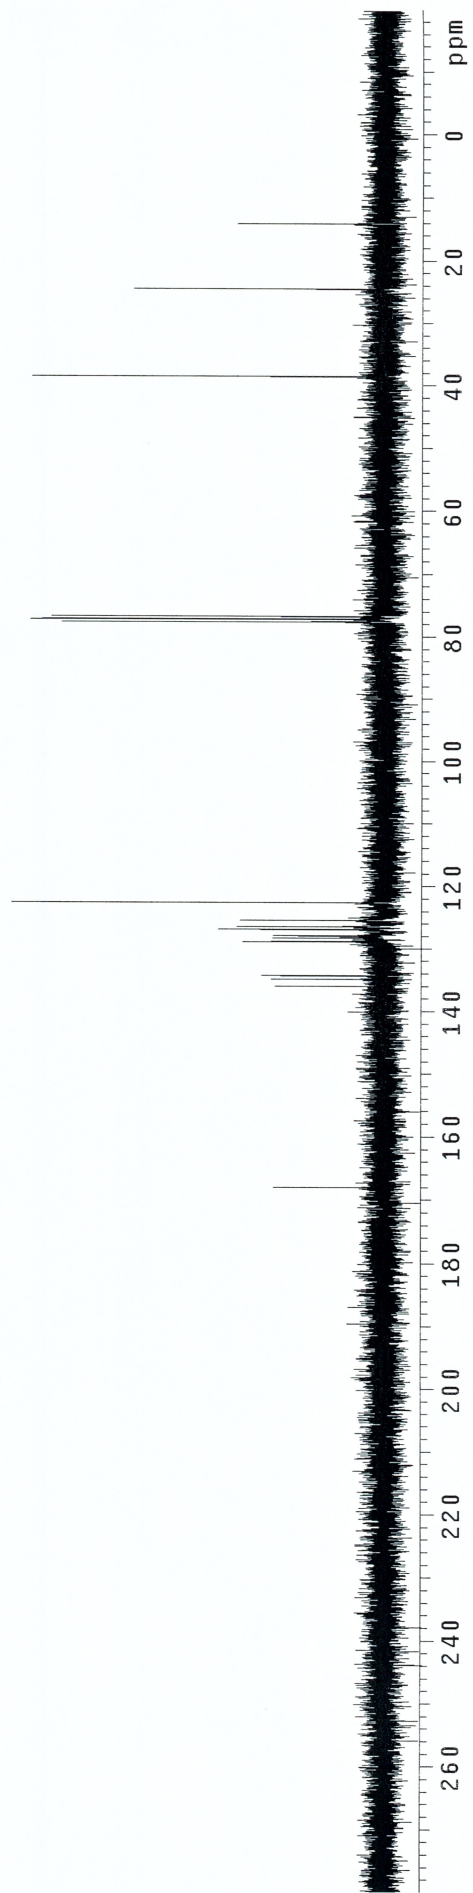

KD123

Pulse Sequence: s2pu1

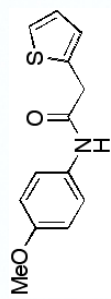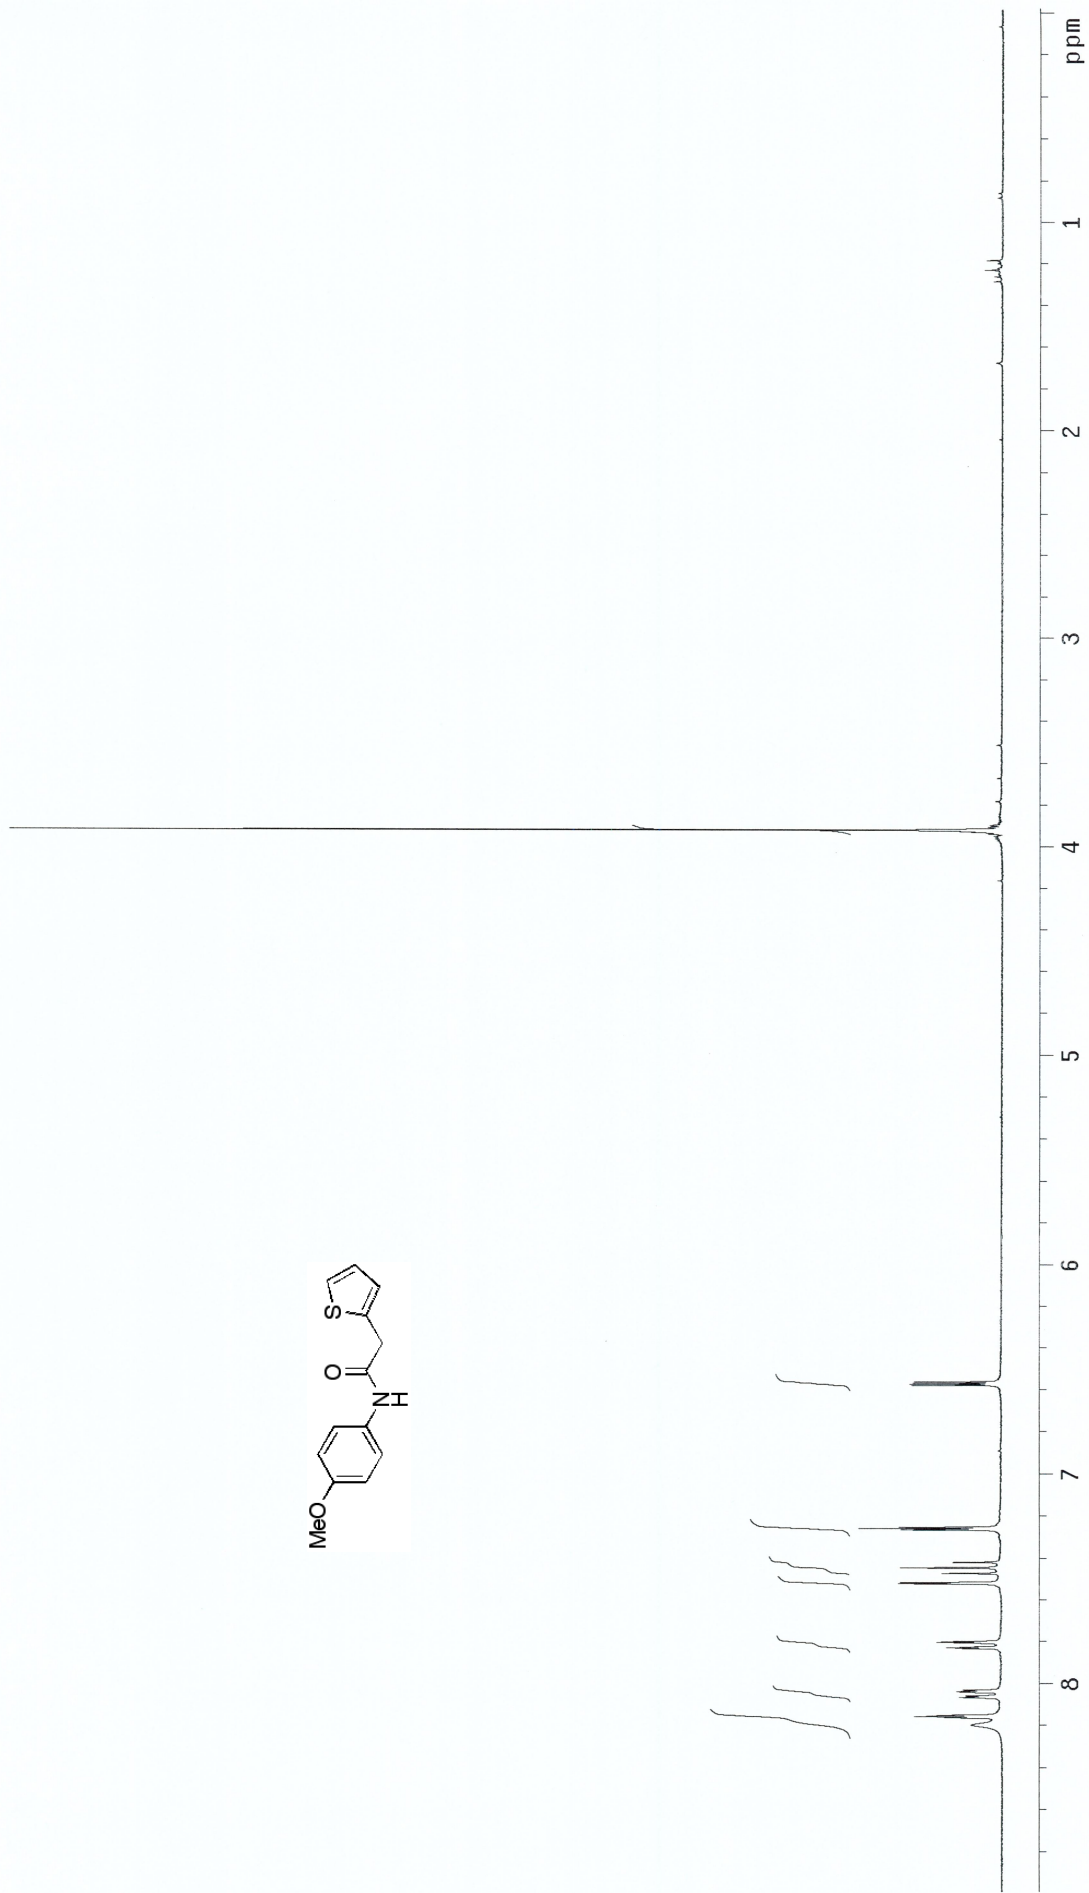



KD113

Pulse Sequence: s2pu1

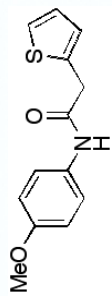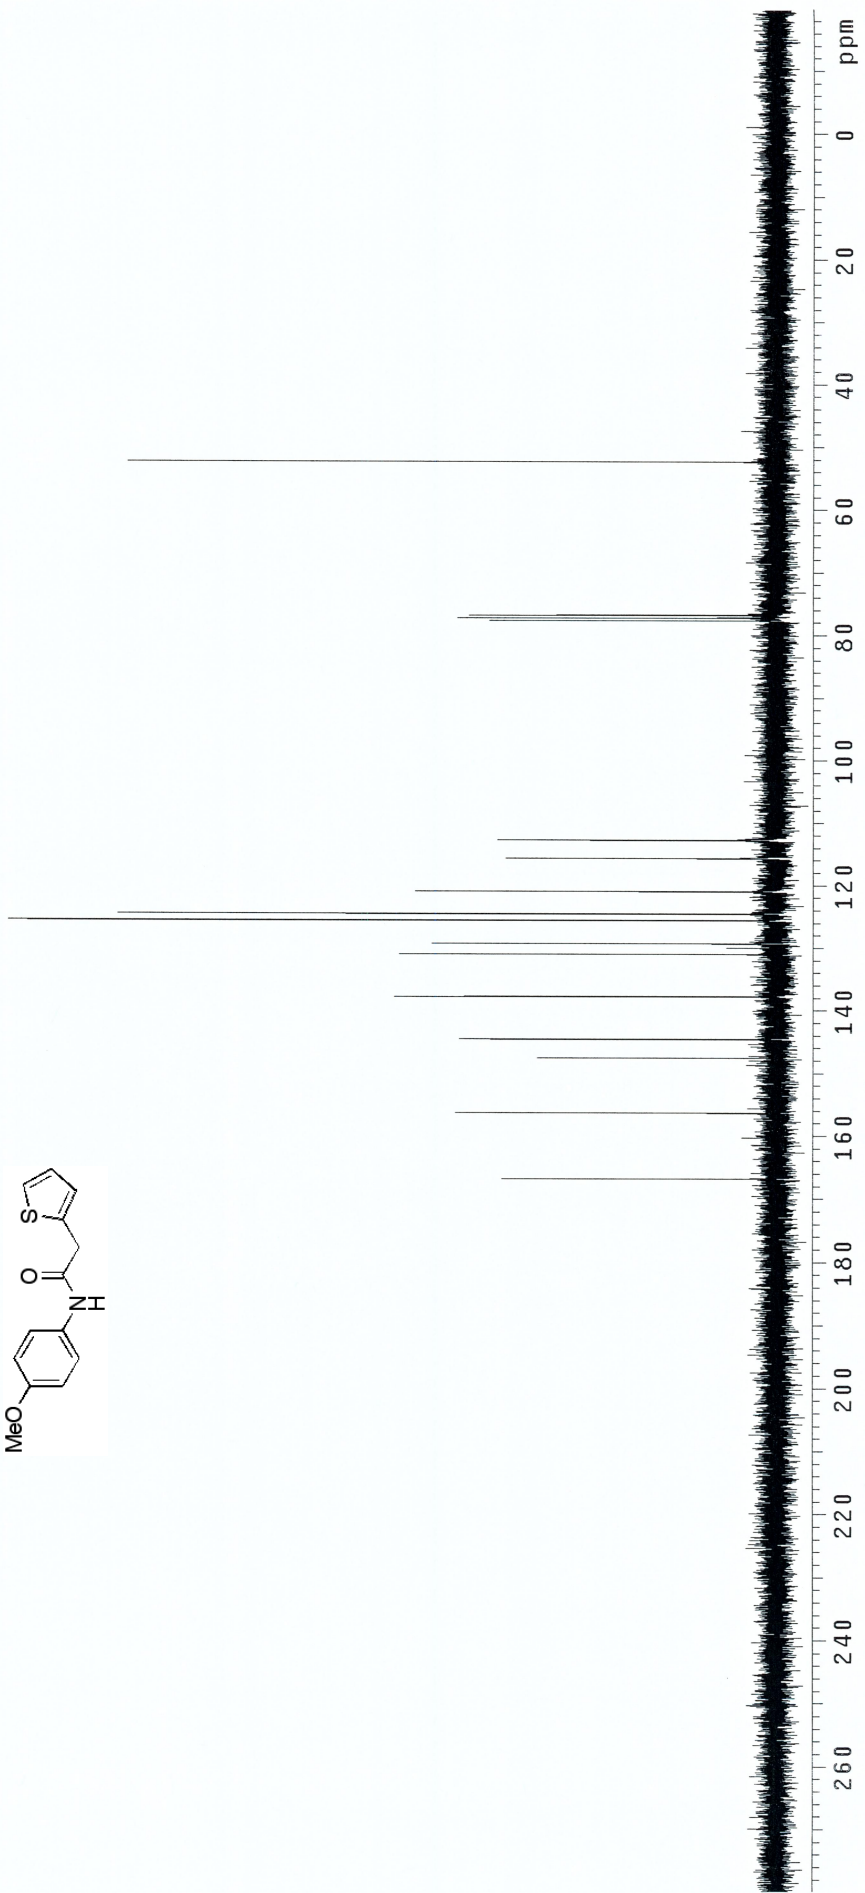

KD81

Pulse Sequence: s2pu1

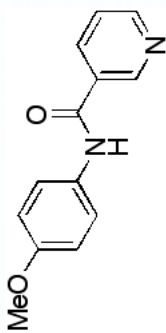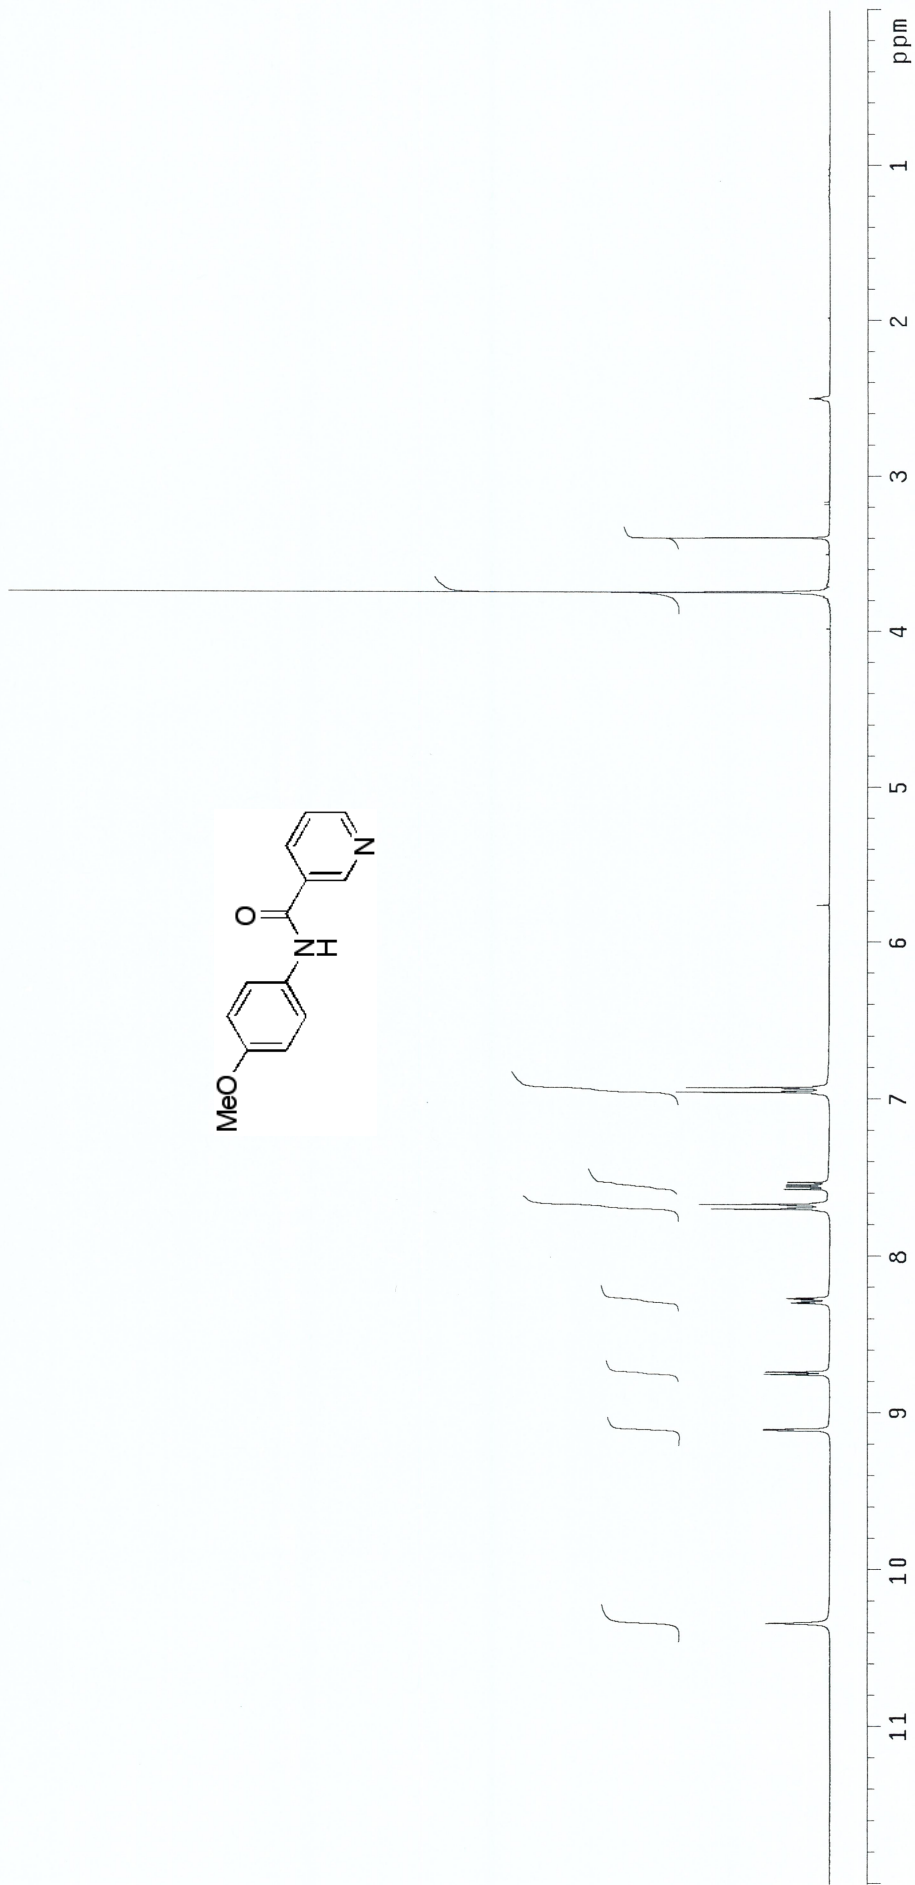



KD81

Pulse Sequence: s2pu1

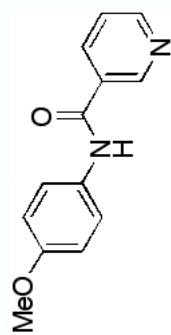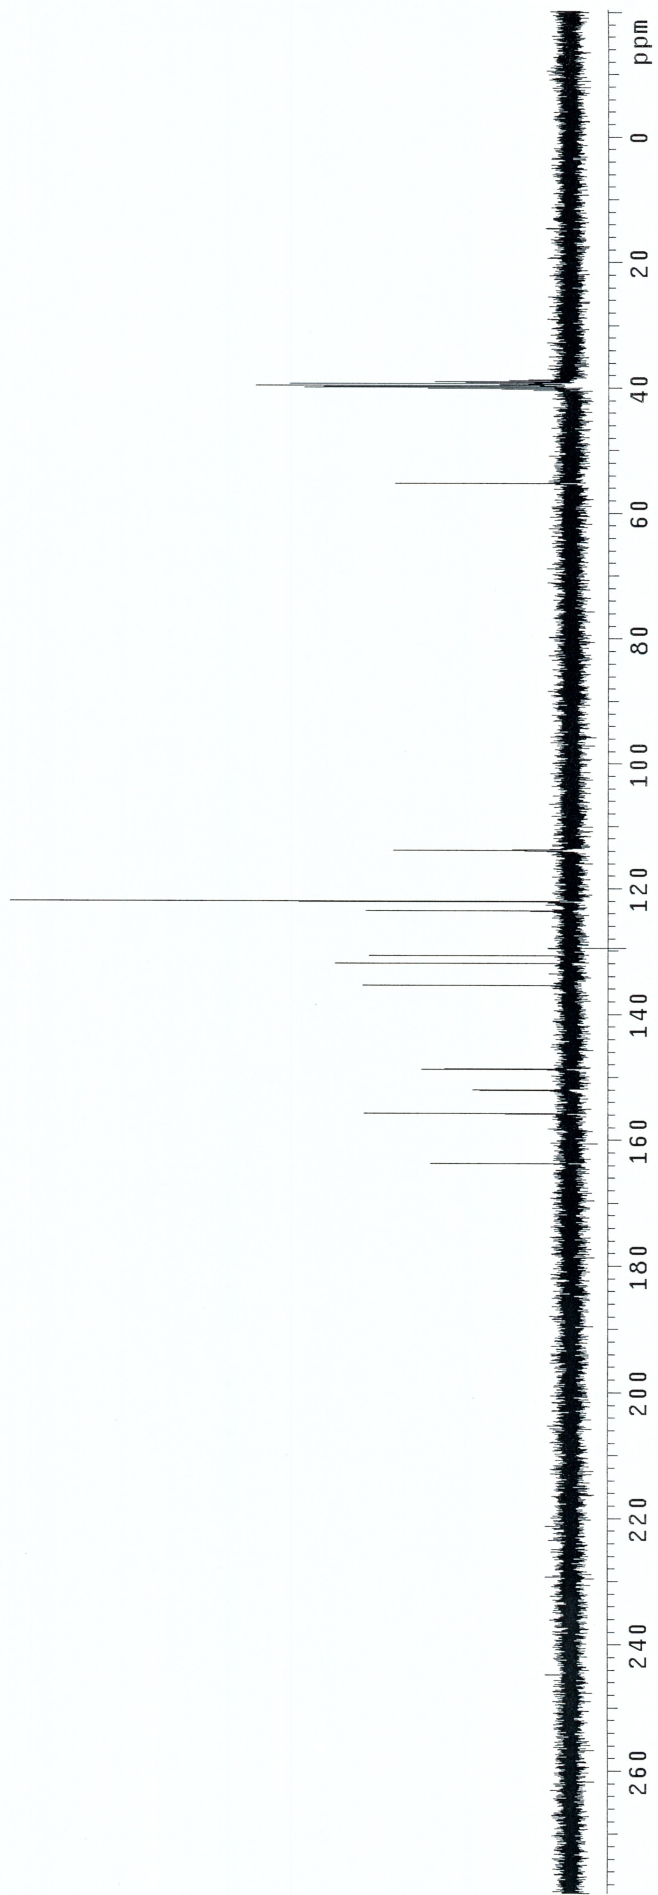

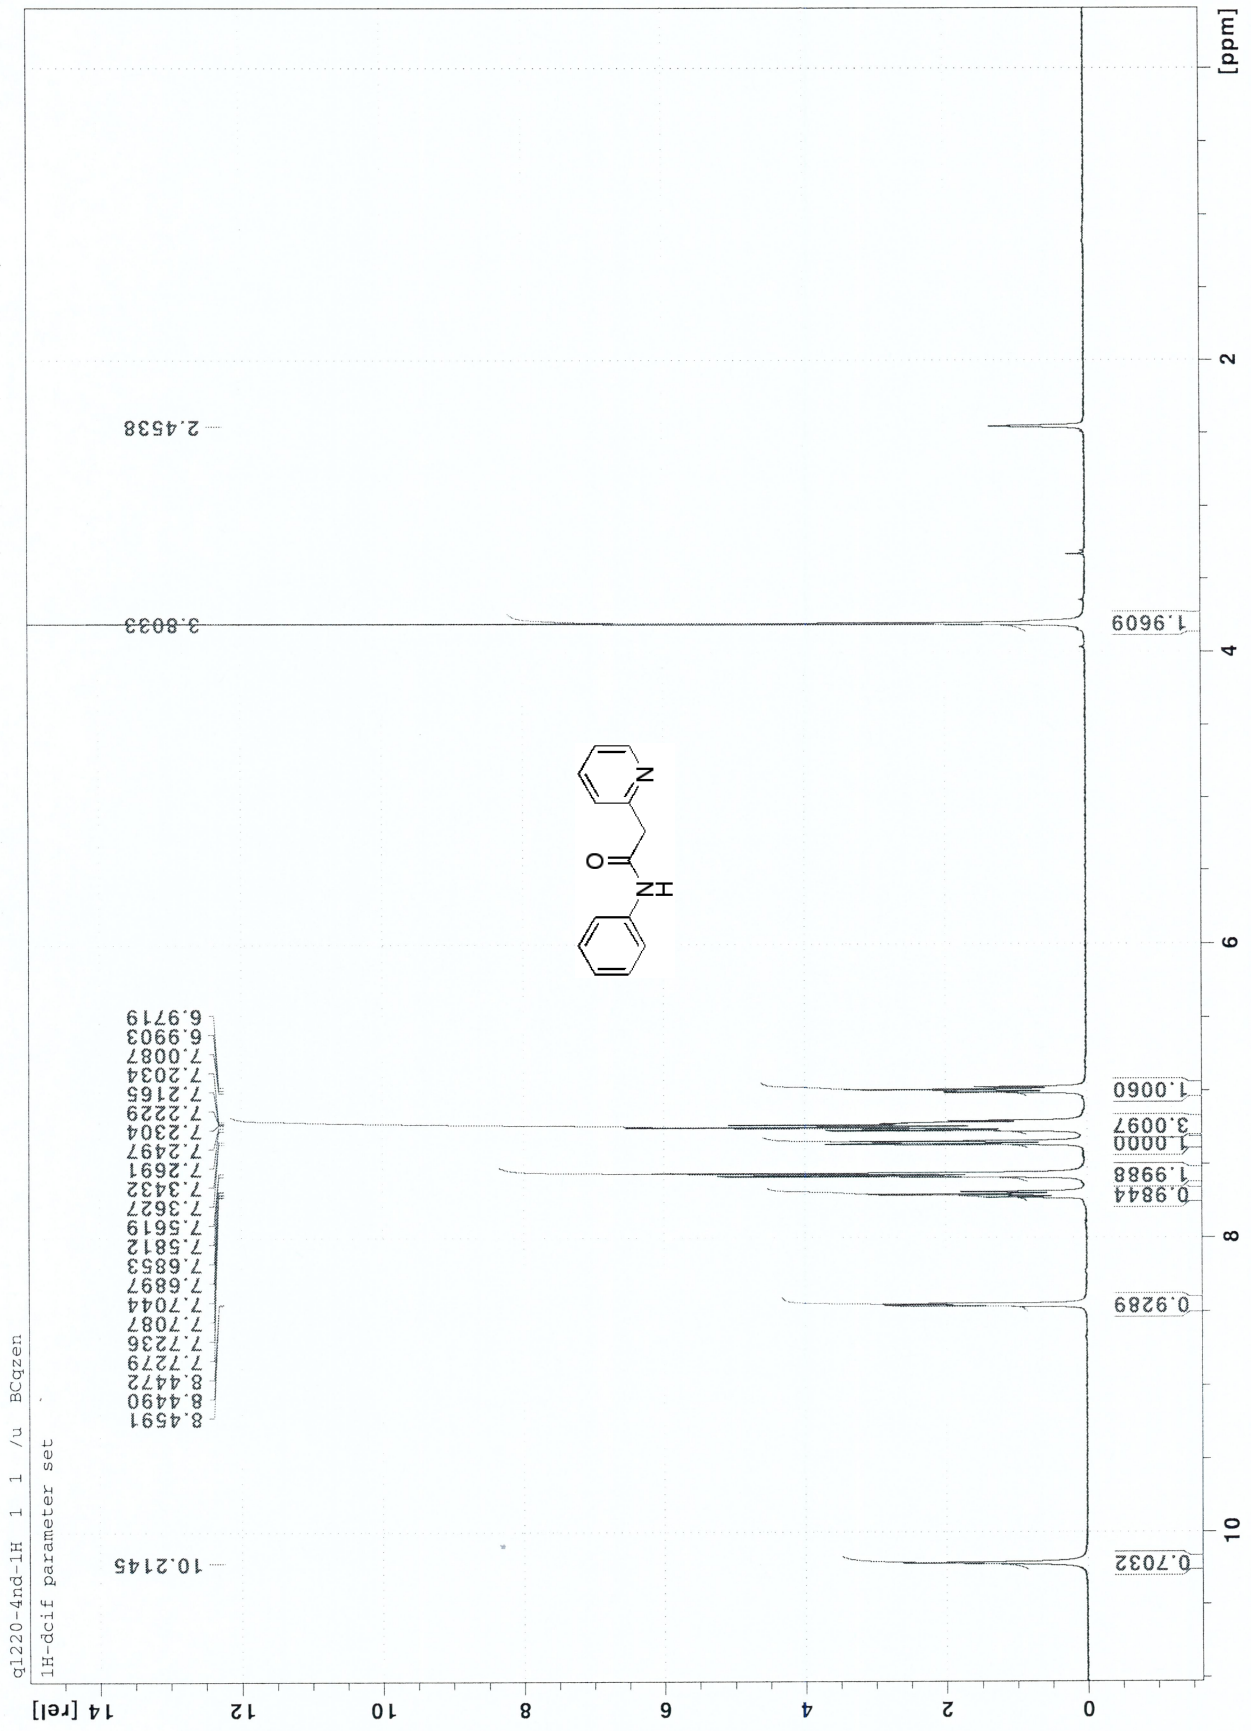

q1220-4nd-1h 1 1 /u BCqzen  
1h-dcif parameter set

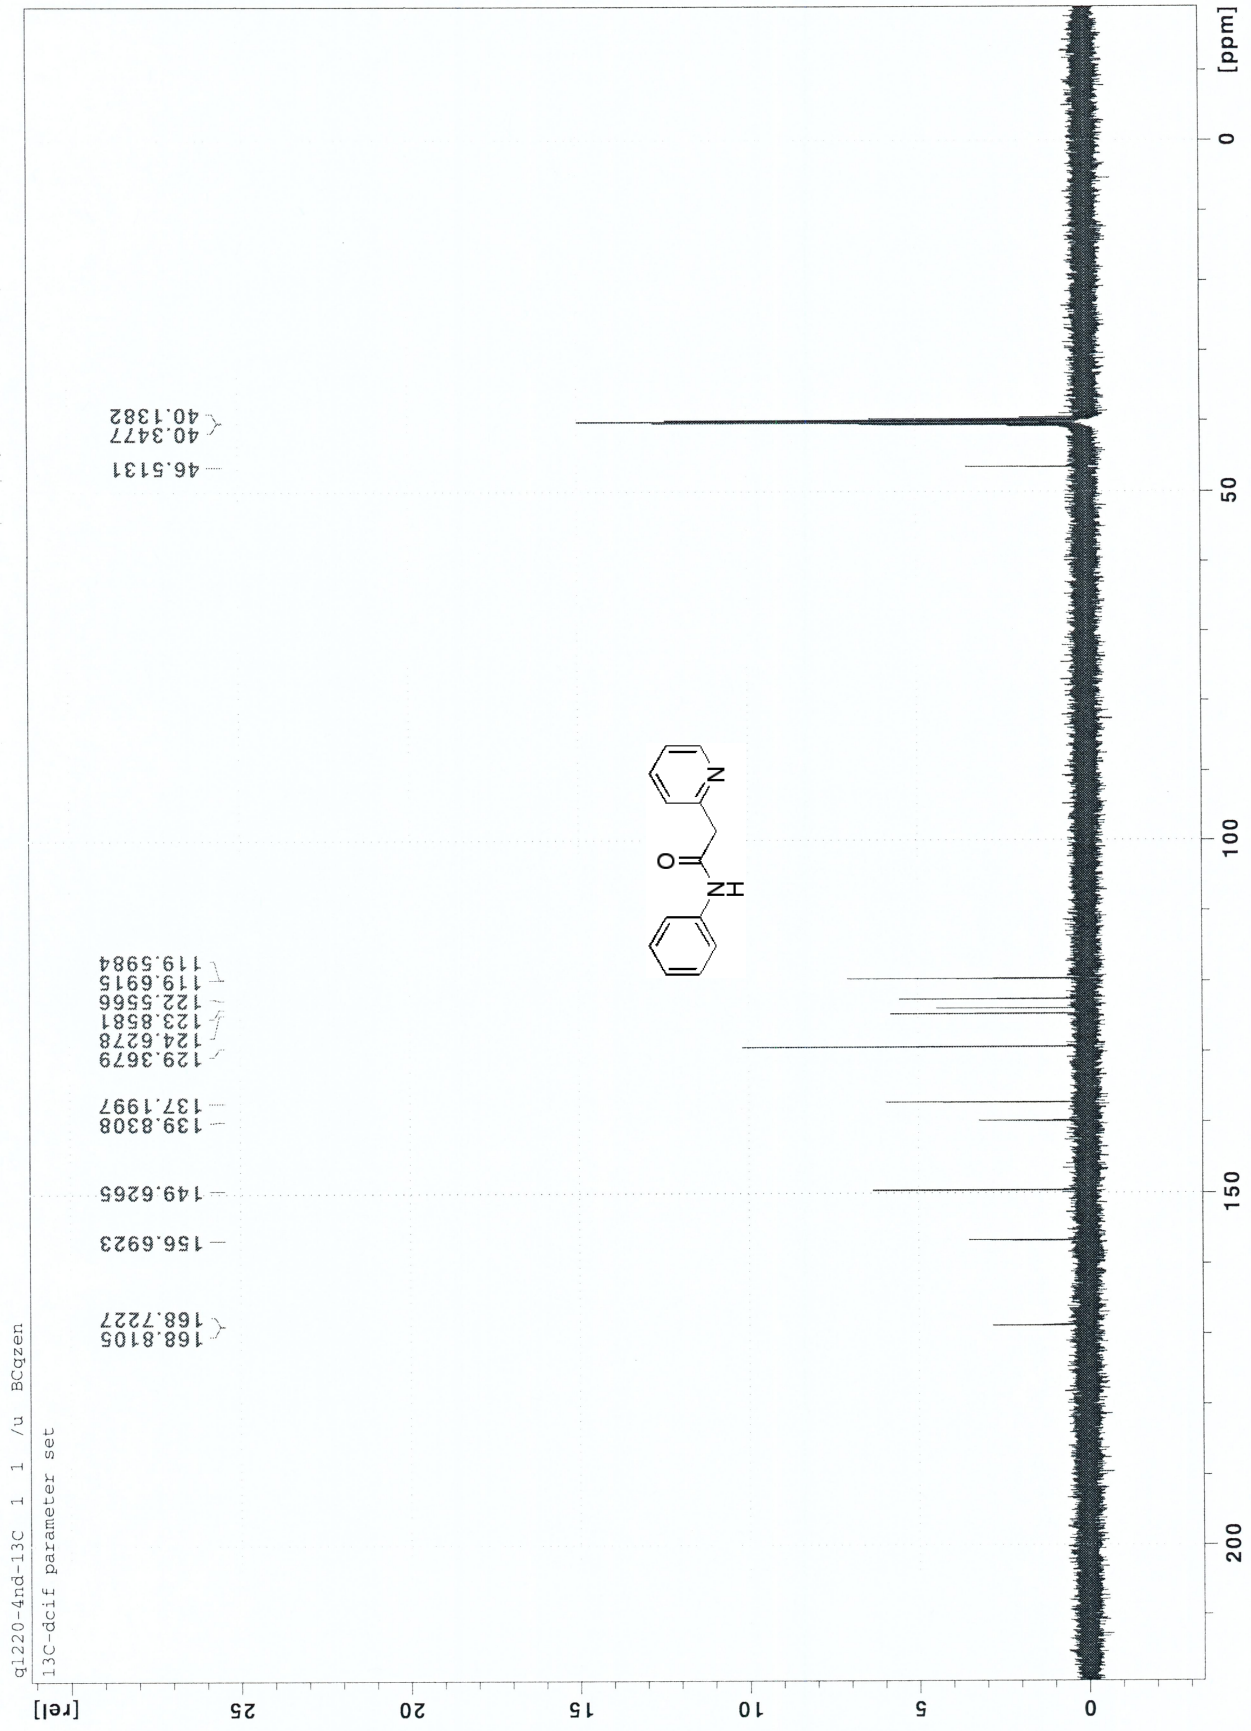



KD128B

Pulse Sequence: s2pu1

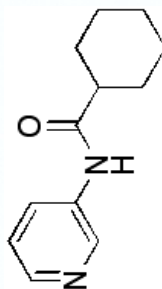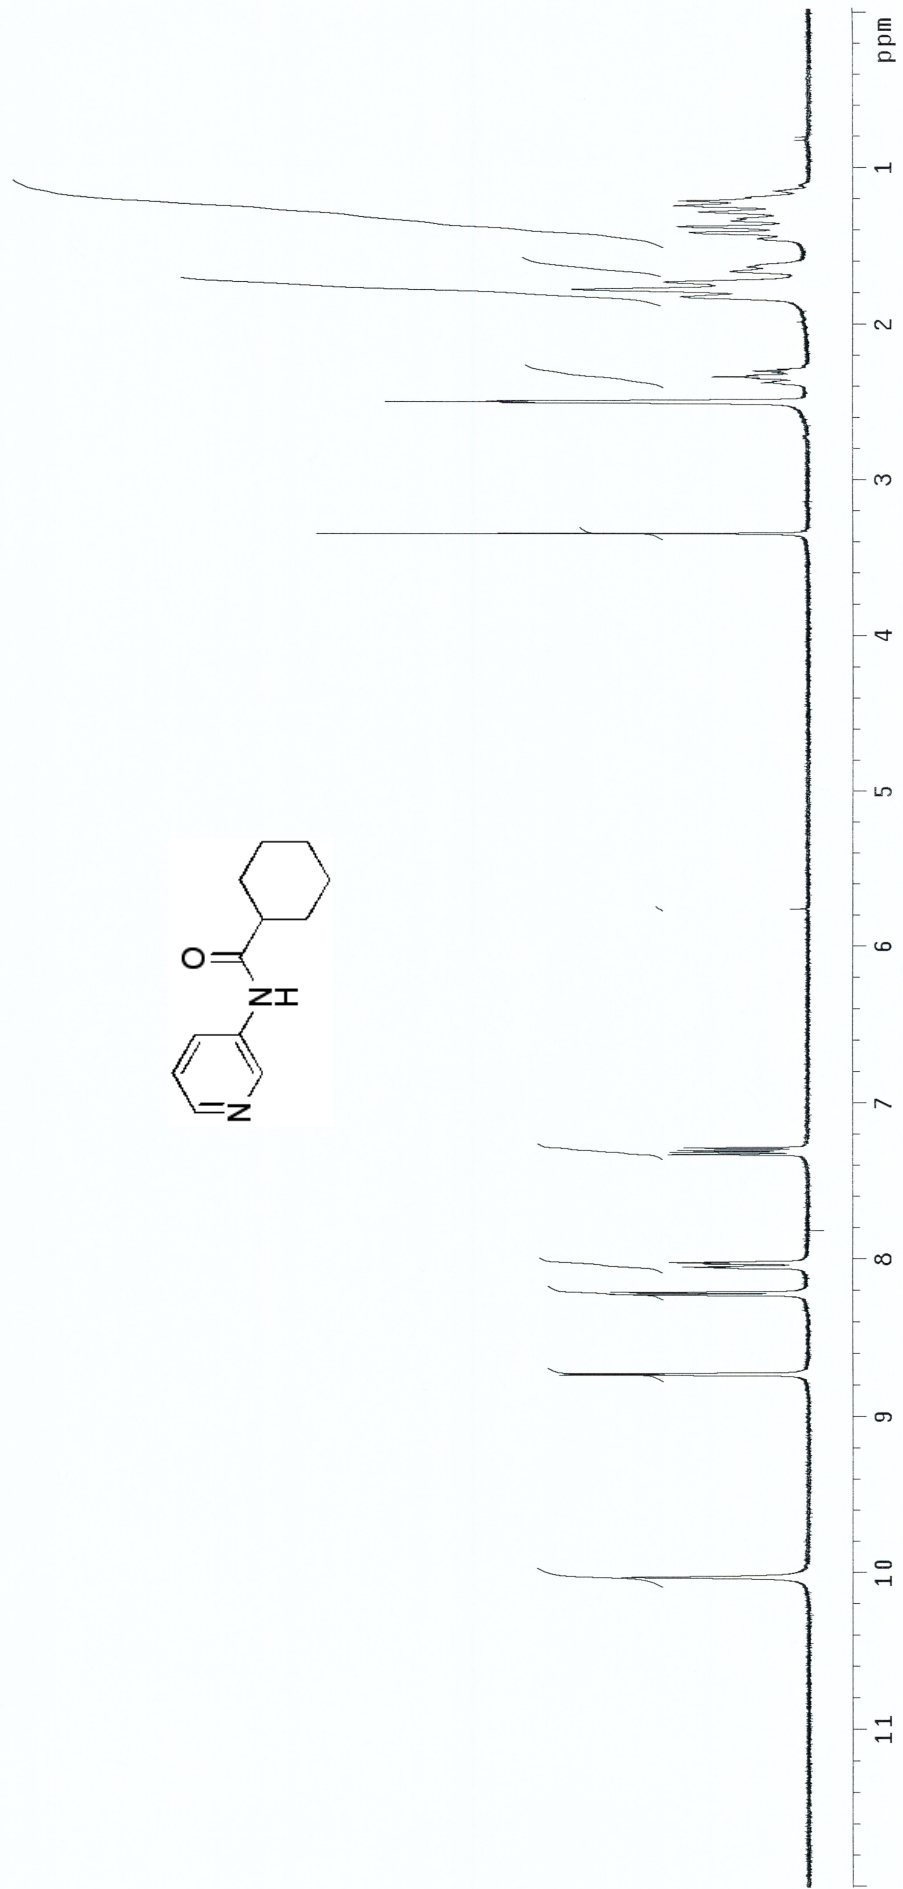



KD128A

Pulse Sequence: s2pu1

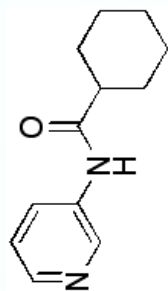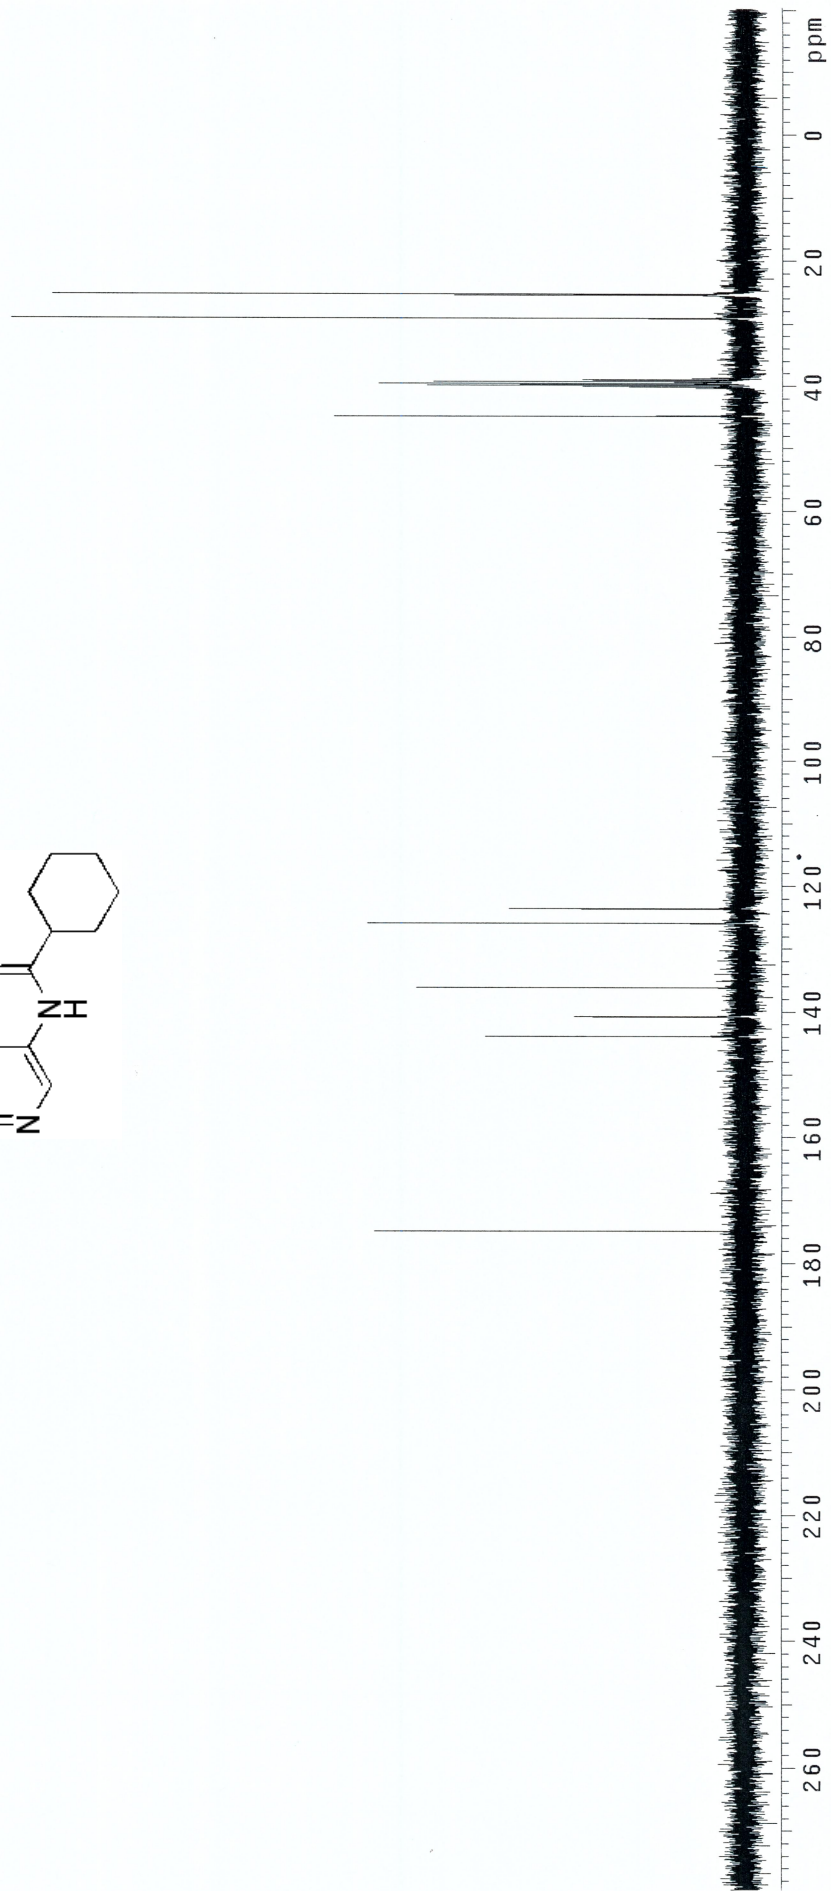

KD124

Pulse Sequence: s2pu1

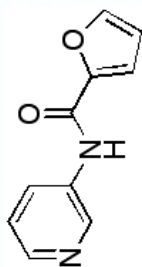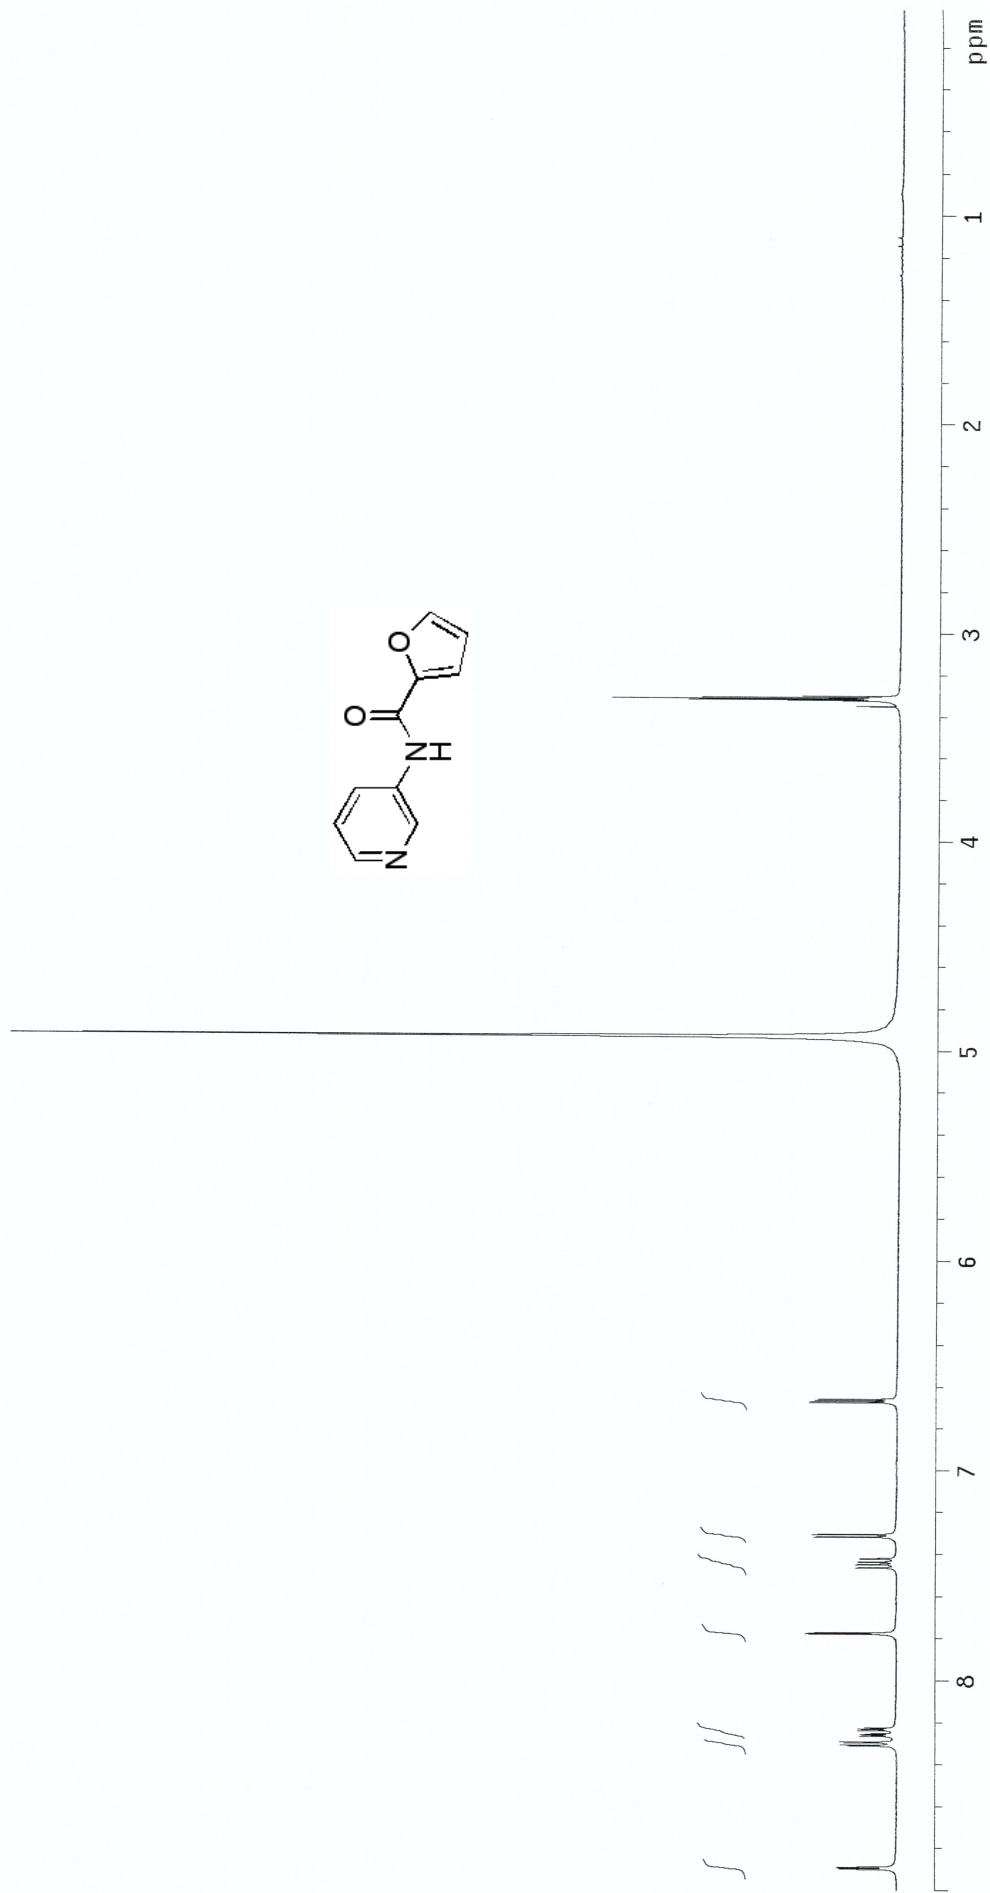

SI 35

KD120  
Pulse Sequence: s2pul1

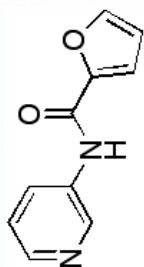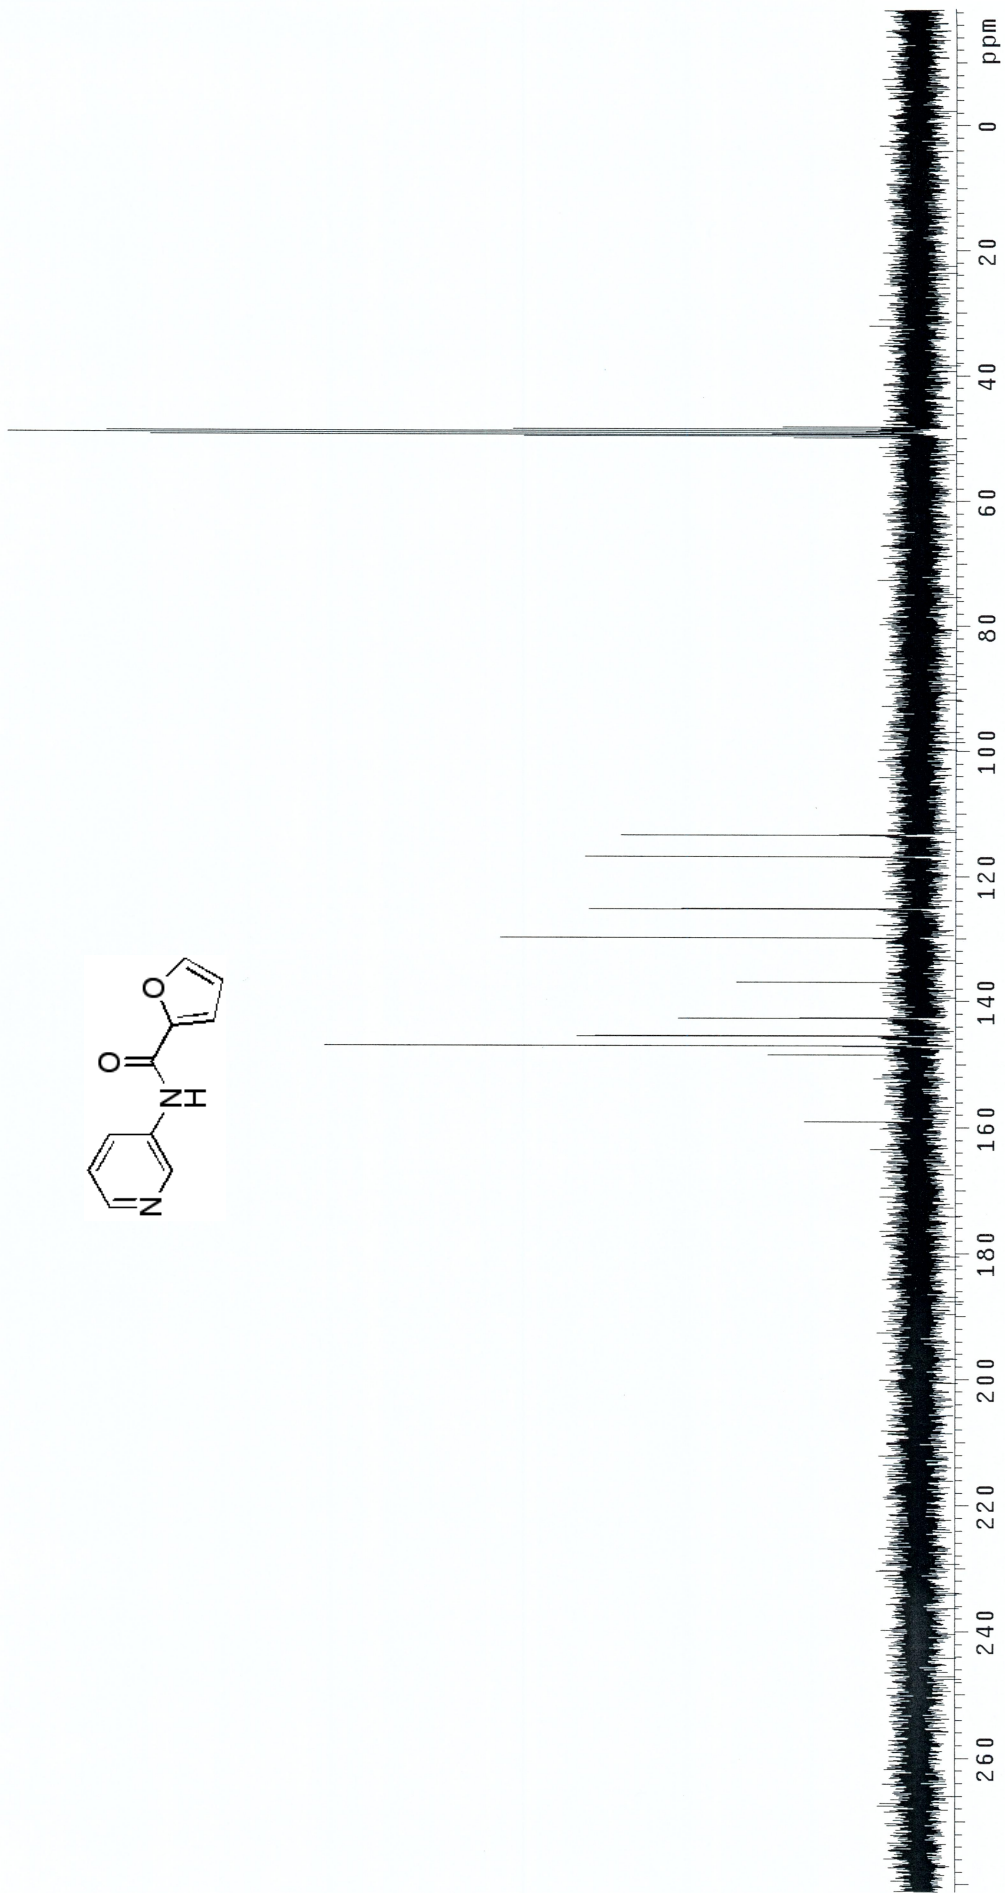

Supplement: NIHMS114111-supplement-SI.pdf [file NIHMS114111-supplement-SI.pdf]
